1

2 **Molecular epidemiology of peste des petits ruminants virus emergence in**  
3 **critically endangered Mongolian saiga antelope and other wild ungulates**

4

5 **Authors**

6 Camilla T. O. Benfield<sup>1\*</sup>, Sarah Hill<sup>1</sup>, Munkduuren Shatar<sup>2</sup>, Enkhtuvshin Shiilegdamba<sup>3</sup>, Batchuluun  
7 Damdinjav<sup>4</sup>, Amanda Fine<sup>5</sup>, Brian Willett<sup>6</sup>, Richard Kock<sup>1</sup>, Arnaud Bataille<sup>7,8</sup>

8

9 <sup>1</sup>Department of Pathobiology and Population Sciences, The Royal Veterinary College, UK

10 <sup>2</sup>Department of Veterinary Services of Dundgobi province, General Authority for Veterinary  
11 Services of Mongolia (GAVS), Mongolia

12 <sup>3</sup>Wildlife Conservation Society, Ulaanbaatar, Mongolia

13 <sup>4</sup>State Central Veterinary Laboratory, Mongolia

14 <sup>5</sup>Wildlife Conservation Society, Health Program, Bronx, NY, USA

15 <sup>6</sup>MRC-University of Glasgow Centre for Virus Research, Glasgow, UK

16 <sup>7</sup>CIRAD, UMR ASTRE, F-34398 Montpellier, France

17 <sup>8</sup>ASTRE, University of Montpellier, CIRAD, INRA, Montpellier, France

18

19 \* Corresponding author

20 Email: [cbenfield@rvc.ac.uk](mailto:cbenfield@rvc.ac.uk) (CTOB)

## 21 **Abstract**

22 Peste des petits ruminants virus (PPRV) causes disease in domestic and wild ungulates, is  
23 the target of a global eradication programme and threatens biodiversity. Understanding the  
24 epidemiology and evolution of PPRV in wildlife is important, but hampered by the paucity of  
25 wildlife-origin PPRV genomes. In this study, full PPRV genomes were generated from three  
26 Mongolian saiga antelope, one Siberian ibex and one goitered gazelle from the 2016-2017 PPRV  
27 outbreak. Phylogenetic analysis showed that for Mongolian and Chinese PPRV since 2013, the  
28 wildlife and livestock-origin genomes were closely related and interspersed. There was strong  
29 phylogenetic support for a monophyletic group of PPRV from Mongolian wildlife and livestock,  
30 belonging to clade of lineage IV PPRV from livestock and wildlife from China since 2013. Discrete  
31 diffusion analysis found strong support for PPRV spread into Mongolia from China and  
32 phylogeographic analysis indicated Xinjiang Province as the most likely origin, although genomic  
33 surveillance for PPRV is poor and lack of sampling from other regions could bias this result. Times of  
34 most recent common ancestor (TMRCA) were June 2015 (95% HPD: August 2014 – March 2016) for  
35 all Mongolian PPRV genomes and May 2016 (95% HPD: October 2015 – October 2016) for  
36 Mongolian wildlife-origin PPRV. This suggests that PPRV was circulating undetected in Mongolia  
37 for at least six months before the first reported outbreak in August 2016, and that wildlife were  
38 likely infected before livestock vaccination began in October 2016. Finally, genetic variation and  
39 positively-selected sites were identified that might be related to PPRV emergence in Mongolian  
40 wildlife. This study is the first to sequence multiple PPRV genomes from a wildlife outbreak, across  
41 several host species. Additional full PPRV genomes and associated metadata from the livestock-  
42 wildlife interface are needed to enhance the power of molecular epidemiology, support PPRV  
43 eradication and safeguard the health of the whole ungulate community.

44

## 45 **Author Summary**

46           Recent mass mortality of critically endangered Mongolian saiga antelope due to peste des  
47   petits ruminants virus (PPRV) has dramatically highlighted the threat this viral disease represents  
48   for biodiversity. The genome of viruses such as PPRV evolve fast, so virus genetic data gathered  
49   from infected animals can be used to trace disease spread between livestock and wildlife, and to  
50   determine if the virus is adapting to infect wildlife more efficiently. Here we obtained PPRV virus  
51   genomes from Mongolian wildlife and compared them with other published PPRV genomes. Using  
52   a molecular clock, we estimated that the disease was circulating in Mongolia well before it was first  
53   reported. Genetic analyses support the hypothesis of virus spread from livestock to wildlife, with  
54   genetic changes potentially helping infection in Asian wild ungulates. However, more PPR virus  
55   genomes and epidemiology data are needed from disease outbreaks in areas shared between  
56   livestock and wildlife to confirm these results and take efficient actions to safeguard the health of  
57   the whole ungulate community.

## 58 Introduction

59 Peste des petits ruminants (PPR) is a contagious viral disease of sheep and goats with  
60 high morbidity and mortality rates, which is a major barrier to sustainable small ruminant  
61 production, dependent livelihoods and economies. Consequently, PPR is the only livestock disease  
62 currently targeted by a Global Eradication Programme (GEP), which aims to rid the world of PPR by  
63 2030 through vaccination of livestock, and thereby contribute to achieving the Sustainable  
64 Development Goals. The etiological agent, peste des petits ruminants virus (PPRV), has a broad  
65 host range, with serological or virological evidence of natural infection in a growing list of wild  
66 species within the order Artiodactyla [1-4]. PPRV infection of both captive and free-ranging wildlife  
67 may result in severe outbreaks and mortality, threatening species' survival and ecosystem integrity.  
68 PPRV has caused mass mortality of mountain caprine species categorised as vulnerable by the IUCN  
69 [5, 6], with > 1000 deaths of wild goats (*Capra aegagrus*) and sheep (*Ovis orientalis*) in Iran [7] and >  
70 750 wild goats in Iraq [8]. Fatal PPR outbreaks have also been reported in free-ranging Sindh ibex  
71 (*Capra aegagrus blythi*) in Pakistan [9] and in ibex (*Capra ibex*) [10-12], bharal (*Pseudois nayaur*) [10-  
72 14], argali sheep (*Ovis ammon*) [10], goitered gazelle (*Gazella subgutturosa*) [10] and Przewalski's  
73 gazelle (*Procapra przewalskii*) [15] in China. To date, the most devastating impact of PPRV on  
74 biodiversity was its emergence in the critically endangered Mongolian saiga antelope (*Saiga tatarica*  
75 *mongolica*) in 2016-2017, which caused a mass mortality event and contributed to loss of ~80% of  
76 the population [16, 17]. In contrast, clinical disease has not been confirmed in free-ranging wildlife  
77 in Africa, despite high apparent PPRV seropositivity in wildlife populations in East Africa [18, 19].  
78 The only published disease outbreak in free-ranging African wildlife in Africa occurred in Dorcas  
79 gazelles (*Gazella dorcas*) in Dinder National Park, Sudan [20]. However, this was not supported by  
80 field data to confirm the nature of the epidemic or event, and so whether this represents true  
81 wildlife disease remains equivocal, whilst African species in captivity have been shown to express  
82 PPR disease in zoological collections in the Middle East [21-23]. Therefore, while it is now clear that  
83 PPRV poses a threat to biodiversity, the determinants of differential disease expression among

84 wildlife hosts are not understood. There are also significant knowledge gaps regarding the role of  
85 wildlife in the epidemiology and evolution of PPRV. It remains unclear whether wildlife can maintain  
86 or transmit the virus to livestock, and thereby pose a threat to the PPR GEP.

87           It is important to assess the genetic diversity of PPRV to understand whether host  
88 range plasticity and viral virulence are linked to genetic changes in the virus. PPRV is a morbillivirus  
89 with a negative sense single-stranded RNA genome of approximately 16 kilobases, which encodes  
90 six structural proteins, the nucleocapsid (N), phosphoprotein (P), matrix (M), fusion (F),  
91 hemagglutinin (H), and polymerase (L) proteins, and two non-structural proteins, V and C. The  
92 infectivity of PPRV is mediated by its envelope glycoproteins, H and F, which are therefore key viral  
93 determinants of cellular and host tropism. H binds the morbillivirus receptors SLAM and nectin-4 on  
94 immune and epithelial host cells, respectively, while F mediates the subsequent membrane fusion  
95 events to enable cell entry. The efficiency of receptor usage and entry into target cells are likely to  
96 be critical barriers to the emergence of morbilliviruses in atypical hosts. A recent study showed that  
97 a single amino acid substitution in PPRV H enabled it to use human SLAM as an entry receptor [24].  
98 Studies on the related morbillivirus canine distemper virus have also shown that only one or two  
99 amino acid changes in H are associated with host range expansion in nature [25, 26] or via *in vitro*  
100 adaptation [27]. The crystal structure of measles virus (MeV) H protein in complex with marmoset  
101 SLAM has been solved [28] and shows that the receptor binding domain (RBD) comprises four sites  
102 on MeV H which interact with SLAM and which are well conserved in PPRV H [24]. Several recent  
103 mutagenesis studies have also identified amino acid residues in PPRV H important for its ability to  
104 bind SLAM [29] and induce cell fusion [30]. In addition to cell entry, PPRV evidently requires  
105 efficient replicative and immune-evasive abilities for successful infection of atypical hosts, but the  
106 role of other viral genes in host range remains obscure.

107           PPRV is classified into 4 genetically distinct lineages, which can be discriminated based  
108 on phylogenetic analysis of short gene regions, often a few hundred nucleotides of the N gene [31,  
109 32]. Lineage IV viruses have dominated both the host range and geographic expansion of PPRV

110 seen in recent years and are now replacing other lineages in many African countries [33-36].  
111 Understanding this expansion is critical to mitigate challenges to the PPR GEP and to understand  
112 the threat of PPRV to biodiversity. To do so necessitates the phylogenetic resolution provided by  
113 full genome sequencing using high coverage high throughput sequencing technologies [37], which  
114 is particularly important since such limited molecular epidemiological data on PPRV in wildlife exists  
115 at the global level. Earlier molecular evolutionary studies of PPRV based on full genomes have  
116 included a few wildlife-origin sequences [38, 39]. However, no studies have hitherto used  
117 phylogenomic approaches to address inter-species transmission patterns of PPRV.

118 In Mongolia, PPR was first confirmed in August 2016 ([https://wahis.oie.int/#/report-](https://wahis.oie.int/#/report-info?reportId=8043)  
119 [info?reportId=8043](https://wahis.oie.int/#/report-info?reportId=8043)), and a full PPRV genome was generated from livestock sampled in September  
120 2016 [40]. The outbreak in Mongolian wildlife was laboratory-confirmed in December 2016 and led  
121 to mortalities of Mongolian saiga antelope (*Saiga tatarica mongolica*), goitered gazelle (*Gazella*  
122 *subgutturosa*), Siberian ibex (*Capra ibex sibirica*) and Argali (*Ovis ammon*), thought to have been  
123 caused by spillover of the virus from livestock and subsequent spread among wild ungulates  
124 (<https://wahis.oie.int/#/report-info?reportId=10463>, [17]). Previously, the only molecular data for  
125 PPRV from Mongolian wildlife were partial N gene sequences from two saiga antelope [17]. Here,  
126 we generated five novel full genome sequences for the PPRV which emerged in three species of  
127 Mongolian wildlife: saiga antelope, goitered gazelle and Siberian ibex. Using these sequences and  
128 all other PPRV genomes available in GenBank from both wildlife and livestock hosts, we performed  
129 phylogenetic and molecular evolutionary analyses to address PPRV emergence in Mongolian  
130 wildlife and dynamics at the livestock-wildlife interface.

131

132

133

134

135

136

137

138

139

140

141

## 142 Results

### 143 Tissue distribution of PPRV in Mongolian wildlife

144 Total RNA was extracted from tissue samples collected at necropsy from four saiga  
 145 antelope, one goitered gazelle and one Siberian ibex (Table 1). To determine the tissue distribution  
 146 of PPRV replication in the wildlife hosts, and select samples for whole genome sequencing, RT-PCR  
 147 for a 350 nucleotide region of the N gene was performed on all available samples. Every tissue  
 148 tested was RT PCR-positive (S1 Fig), with an amplicon of the expected size, namely liver and ocular  
 149 swab from Siberian ibex; tongue, soft palate and lung samples from goitered gazelle, and tongue,  
 150 soft palate, ocular and nasal swabs, gum scurf, mesenteric lymph node, spleen, liver, lung, heart  
 151 and blood from saiga antelope. Nucleic acid sequencing showed that this N gene region was  
 152 identical in all six wildlife hosts, and to the two published partial N gene sequences from saiga [17],  
 153 and differed from the Mongolian livestock PPRV (KY888168.1) by two nucleotides (data not shown).

154 **Table 1. Sampling locations and sample types for PPRV-infected wildlife.**

| Host ID | Species<br>Common Name      | Province       | Soum or<br>subdistrict | Name of<br>sampling<br>location | GPS coordinates |            | Sample Type<br>(RNA)     | Sample<br>ID |
|---------|-----------------------------|----------------|------------------------|---------------------------------|-----------------|------------|--------------------------|--------------|
|         |                             |                |                        |                                 | Latitude        | Longitude  |                          |              |
| Saiga_2 | Mongolian saiga<br>antelope | Khovd          | Chandmani              | Takhilt                         | 47.35.55.5      | 93.13.51.5 | lung                     | 1            |
|         |                             |                |                        |                                 |                 |            | liver                    | 2            |
|         |                             |                |                        |                                 |                 |            | spleen                   | 3            |
|         |                             |                |                        |                                 |                 |            | heart                    | 4            |
|         |                             |                |                        |                                 |                 |            | mesenteric<br>lymph node | 5            |
| Saiga_1 | Mongolian saiga<br>antelope | Khovd          | Chandmani              | Nuramt                          | 48.03.51.3      | 92.46.15.3 | eye swab                 | 6            |
|         |                             |                |                        |                                 |                 |            | gum scurf                | 7            |
|         |                             |                |                        |                                 |                 |            | palate scurf             | 8            |
|         |                             |                |                        |                                 |                 |            | nasal swab               | 9            |
|         |                             |                |                        |                                 |                 |            | tongue scurf             | 10           |
| Saiga_3 | Mongolian saiga<br>antelope | Khovd          | Chandmani              | Suudal<br>khuruu                | 47.28.09.1      | 93.30.48.8 | spleen                   | 11           |
|         |                             |                |                        |                                 |                 |            | liver                    | 13           |
|         |                             |                |                        |                                 |                 |            | mesenteric<br>lymph node | 14           |
|         |                             |                |                        |                                 |                 |            | nasal swab               | 15           |
|         |                             |                |                        |                                 |                 |            | eye swab                 | 16           |
| Saiga_4 | Mongolian saiga<br>antelope | Gobi-<br>Altai | Khukhmorit             | Sain ust                        | 47.16.03.6      | 94.07.22.4 | blood                    | 17           |
|         |                             |                |                        |                                 |                 |            | spleen                   | 18           |



|                  |                  |            |        |                  |            |            |               |    |
|------------------|------------------|------------|--------|------------------|------------|------------|---------------|----|
|                  |                  |            |        |                  |            |            | liver         | 19 |
|                  |                  |            |        |                  |            |            | heart         | 20 |
|                  |                  |            |        |                  |            |            | lung          | 21 |
| Siberian ibex    | Siberian ibex    | Gobi-Altai | Tugrug | Khurengoliin ekh | 45.45.21.1 | 95.11.57.1 | liver         | 22 |
|                  |                  |            |        |                  |            |            | eye swab      | 23 |
| Goitered gazelle | Goitered gazelle | Khovd      | Darvi  | Tungalagiinus    | 46.48.04.9 | 93.40.08.0 | lung          | 24 |
|                  |                  |            |        |                  |            |            | tongue tissue | 25 |
|                  |                  |            |        |                  |            |            | soft palate   | 26 |

155 Sample ID refers to lane labels in S1 Fig.  
156

### 157 **PPRV genome sequences from Mongolian wildlife hosts**

158 Using the Illumina NextSeq sequencing platform, five new PPRV genomes were obtained  
159 for three wildlife species: three individuals of the Mongolian saiga antelope, one goitered gazelle,  
160 and one Siberian ibex (S1 Table). The genomes were 15,954 nucleotides in length, and contained a  
161 6-nucleotide insertion within the 5' UTR of F gene (at position 5216 in the alignment), shared by  
162 PPRV from Mongolian livestock (KY888168.1) and Chinese lineage IV strains after 2013 [41], but not  
163 observed in other published PPRV genomes. Two of the PPRV genomes from saiga had complete  
164 nucleotide coverage across the entire genome (saiga3 and saiga4) whereas another sequence from  
165 saiga contained sequence gaps totalling 1133 nucleotides, the goitered gazelle sequence had a 33  
166 nucleotide gap (in the M-F intergenic region) and the ibex sequence a 759 nucleotide gap (in the M-  
167 F intergenic region, plus 39nt of the F gene which was later confirmed by F gene RT-PCR). The two  
168 complete PPRV sequences from different saiga individuals differed from each other at only three  
169 nucleotide sites. Aligning the PPRV sequences from saiga with the only full PPRV genome available  
170 for Mongolian livestock (KY888168.1), showed 99.7% nucleotide identity, i.e. out of 15,954 nt sites  
171 in the genome, there were 42 (saiga 4) or 45 (saiga 3) nucleotide differences.

172

### 173 **Evolutionary rates and lineage divergence of PPRV**

174 Following sequence curation as described above, 76 PPRV genomes from Genbank were  
175 added to the five novel PPRV genomes generated in this study, yielding a total of 81 sequences for

176 phylogenetic analysis. These spanned 49 years from 1969 to December 2018, and included isolates  
177 from 24 countries. Previous phylogenomic analyses have included sequences found to be unreliable  
178 by our recombination analysis [38, 39, 41, 42], which we excluded (see methods section and S2  
179 Table). We therefore first analysed the evolutionary rates and global lineage diversification of PPRV  
180 using our Bayesian time-scaled phylogeny of 81 genomes.

181 The mean evolutionary rate across the phylogeny, under an uncorrelated relaxed clock  
182 model found to be the best fit for the data, was  $9.22E-4$  nucleotide substitutions/site/year (95%  
183 highest posterior density (HPD) interval:  $6.78E-4$  -  $1.17E-3$ ) (Fig 1A). Table 2 gives the countries of  
184 origins and divergence times of PPRV lineages inferred from the Bayesian phylogenetic analysis.  
185 For lineage IV, which is expanding its geographic and host range, the median TMRCA was  
186 estimated to be 1975 (95% HPD: 1961-1985) and its country of origin was inferred as Nigeria, with  
187 moderate support (67% root state posterior probability).

188 **Table 2. Time to the most recent common ancestor (TMRCA) and country of origin of PPRV**  
189 **lineages.**

| PPRV Lineage | TMRCA  |                  | Country of origin |                                  |
|--------------|--------|------------------|-------------------|----------------------------------|
|              | Median | 95% HPD interval | Country           | Root state posterior probability |
| All (root)   | 1919   | 1884-1945        | Benin             | 46.0%                            |
| I            | 1930   | 1902-1949        | Benin             | 52.4%                            |
| II           | 1945   | 1926-1959        | Benin             | 55.5%                            |
| III          | 1919   | 1884-1945        | Benin             | 46.0%                            |
| IV           | 1975   | 1961-1985        | Nigeria           | 67.0%                            |

190 TMRCA and countries of origin were inferred from the Bayesian phylogeny shown in Fig 1A using  
191 FigTree. TMRCA is given to the nearest complete year. HPD= Highest Posterior Density.

192

### 193 **Phylogenetic analysis of PPRV at the livestock-wildlife interface**

194 Including the five novel genomes from this study, twelve wildlife-origin PPRV genomes are  
195 currently available (Table 3), although one of these (KT633939.1/ibex/China/2015-01-20) was these

196 was excluded from our phylogenetic analysis. Two cases occurred in zoological collections, and the  
 197 other ten PPRV genomes were from infections of free-ranging wildlife. Eleven of the wildlife PPRV  
 198 genomes belong to lineage IV and one to lineage III. The only countries having both wildlife and  
 199 livestock sequences were Mongolia and China. In contrast, three Middle Eastern countries, Israel,  
 200 Iraq and UAE, had full PPRV genomes available in GenBank from wildlife hosts, but no genomes  
 201 from infected livestock were available for these countries. Table 3 summarises the key  
 202 epidemiological data for the 2016-2017 outbreak in Mongolian wildlife [17, 43] and the disease  
 203 events associated with the other available wildlife-origin PPRV genomes.

204 **Table 3. Twelve PPRV full genomes available from wildlife host species and associated**  
 205 **metadata.**

| Sequence ID/<br>GenBank<br>Accession No. | PPRV<br>Lineage | Date<br>(YYYY-<br>MM) | Country  | Host species<br>( <i>Latin name</i> )                                  | Free-<br>ranging/<br>Captive | Disease event                                                    | Key epidemiological &<br>livestock interface data for<br>disease events associated with<br>wildlife-origin PPRV genomes                                                                                                                                                                                                                                                                                                                                                                           |
|------------------------------------------|-----------------|-----------------------|----------|------------------------------------------------------------------------|------------------------------|------------------------------------------------------------------|---------------------------------------------------------------------------------------------------------------------------------------------------------------------------------------------------------------------------------------------------------------------------------------------------------------------------------------------------------------------------------------------------------------------------------------------------------------------------------------------------|
| Saiga_1                                  | IV              | 2017-01               | Mongolia | Mongolian saiga<br>antelope<br>( <i>Saiga tatarica<br/>mongolica</i> ) | Free-<br>ranging             | Mass mortality<br><br>>80%<br>population<br>decline<br>estimated | The first suspected (not<br>laboratory confirmed) PPR<br>deaths in saiga were reported<br>by herders in December 2016<br>before official confirmation of<br>PPRV infection in saiga on 27 <sup>th</sup><br>December 2016 [17]. The first<br>PPR outbreak in livestock in<br>Mongolia occurred in August<br>2016 (OIE report 20934). Mass<br>livestock vaccination was<br>undertaken in Western<br>Mongolia in October 2016 [17,<br>43]. The last saiga PPR case was<br>reported in May 2017 [17]. |
| Saiga_3<br>(MZ061719)                    | IV              | 2017-01               | Mongolia | Mongolian saiga<br>antelope                                            | Free-<br>ranging             | As above                                                         | As above                                                                                                                                                                                                                                                                                                                                                                                                                                                                                          |
| Saiga_4<br>(MZ061720)                    | IV              | 2017-01               | Mongolia | Mongolian saiga<br>antelope                                            | Free-<br>ranging             | As above                                                         | As above                                                                                                                                                                                                                                                                                                                                                                                                                                                                                          |
| Siberian ibex<br>(MZ061721)              | IV              | 2017-01               | Mongolia | Siberian ibex<br>( <i>Capra sibirica</i> )                             | Free-<br>ranging             | Mortality<br>(clusters)                                          | Clusters of cases; 24 ibex<br>carcasses disposed by<br>government January-June 2017<br>[17]. Suspected (not laboratory<br>confirmed) cases reported in<br>ibex in July/August 2016 in<br>South-western part of Khovd<br>province. The latest confirmed<br>ibex case occurred in January<br>2018.                                                                                                                                                                                                  |
| Goitered<br>gazelle<br>(MZ061722)        | IV              | 2017-01               | Mongolia | Goitered gazelle<br>( <i>Gazella<br/>subgutturosa</i> )                | Free-<br>ranging             | Mortality<br>(sporadic)                                          | Sporadic cases; 41 Goitered<br>gazelle carcasses disposed by<br>government January-June 2017<br>[17]. Post-mortem histological<br>findings in PPRV-infected<br>goitered gazelle given in [17].                                                                                                                                                                                                                                                                                                    |
| MN121838.1                               | IV              | 2018-12               | China    | Przewalski's<br>gazelle<br>( <i>Procapra</i> )                         | Free-<br>ranging             | Mortality (single<br>case)                                       | Full genome reported by [15].<br>Outbreak of PPRV in sheep<br>occurred in the same area of                                                                                                                                                                                                                                                                                                                                                                                                        |

|             |     |         |                  |                                             |              |                                     |                                                                                                                                                                                                                                                                                                                                                                                                                                                                                                                                                                                                                                                                                         |
|-------------|-----|---------|------------------|---------------------------------------------|--------------|-------------------------------------|-----------------------------------------------------------------------------------------------------------------------------------------------------------------------------------------------------------------------------------------------------------------------------------------------------------------------------------------------------------------------------------------------------------------------------------------------------------------------------------------------------------------------------------------------------------------------------------------------------------------------------------------------------------------------------------------|
|             |     |         |                  | <i>przewalskii</i>                          |              |                                     | northwest Gansu province in October 2018 [15].                                                                                                                                                                                                                                                                                                                                                                                                                                                                                                                                                                                                                                          |
| KT633939.1* | IV  | 2015-01 | China            | Ibex ( <i>Capra ibex</i> )                  | Free-ranging | Mortality (38 ibex mortalities)     | Full genome reported by [12]. 38 ibex mortalities reported in January/February 2015 [11]. Mucopurulent oculo-nasal discharge, diarrhoea and pulmonary congestion at post-mortem was reported [12].                                                                                                                                                                                                                                                                                                                                                                                                                                                                                      |
| JX217850.1  | IV  | 2008-01 | China (Tibet)    | Bharal ( <i>Pseudois nayaur</i> )           | Free-ranging | Mortality                           | Full genome reported by [13]. Sequenced case showed PPR-compatible clinical signs. 19 dead bharal and 6 dead Mongolian gazelles ( <i>Procapra gutturosa</i> ) were found in the same location but PPRV was not confirmed in these [14]. Epidemiological evidence of PPR outbreaks in livestock nearby in September 2007 [14].                                                                                                                                                                                                                                                                                                                                                           |
| MN369542.1  | IV  | 2018-08 | UAE              | Mountain gazelle ( <i>Gazella gazella</i> ) | Free-ranging | Mass mortality (hundreds of deaths) | Gazelles share desert grazing with free-roaming domestic small ruminants in this area. No concurrent disease was seen in domestic small ruminants.                                                                                                                                                                                                                                                                                                                                                                                                                                                                                                                                      |
| KJ867545.1  | III | 1986    | UAE              | Dorcas Gazelle ( <i>Gazella dorcas</i> )    | Captive      | Multi-species disease outbreak      | Full genome reported by [38]. Disease outbreak in a zoological collection at Al Ain which clinically affected gazelles (Gazellinae), ibex and sheep (Caprinae) and gemsbok (Hippotraginae) [22].                                                                                                                                                                                                                                                                                                                                                                                                                                                                                        |
| MF678816.1  | IV  | 2017-01 | Israel           | Nubian ibex ( <i>Capra nubiana</i> )        | Captive      | Mortality                           | Over 2/3 of a captive herd of 32 Nubian ibex died following peracute/acute presentation [21]. Pathological findings differed from those typical in sheep and goats: abomasitis was seen commonly but oral and pulmonary lesions were rare.                                                                                                                                                                                                                                                                                                                                                                                                                                              |
| MK408669.1  | IV  | 2011-02 | Iraq (Kurdistan) | Wild goat ( <i>Capra aegagrus</i> )         | Free-ranging | Mass mortality                      | >750 deaths in <i>Capra aegagrus</i> were reported August 2010 and February 2011 [8]. This was the first report of PPRV in Kurdistan but the affected area is close to the Turkish border where PPRV is endemic [8]. No concurrent disease in domestic ruminants was reported, likely due to annual vaccination [8]. Due to its close relationship to AJ849636.2/sheep/Turkey/2000, this strain was inferred to have been circulating in the region for more than 10 years (Hoffmann et al., 2012). In experimental challenge studies, the MK408669.1 strain was virulent and transmissible among sheep and goats [44] and caused clinical signs and onwards transmission in pigs [45]. |

206 The genomes generated in this study are shown in grey. (\*): this sequence showed a significant  
 207 signature of recombination, most likely associated with laboratory contamination, and was not  
 208 included in this study.

209

210           Assessing the host-traited MCC tree shows that the wildlife-origin PPRV from China after  
211 2013, i.e. MN121838.1 (Przewalski's gazelle), lies within the clade of livestock PPRV (Fig 1B). In  
212 contrast, several other wildlife PPRV genomes lie on branches that are basal to clades circulating in  
213 nearby locations. For example, PPRV from a bharal (Tibet, 2008) was basal to Chinese livestock  
214 sequences from 2007, PPRV from a mountain gazelle (UAE, 2018) was basal to a clade of six  
215 livestock sequences from India in 2014-2016, and PPRV from a Nubian ibex (Israel, 2017) was on a  
216 long branch basal to isolates from Turkey and Iraqi Kurdistan close to the Turkish border (Fig 1B).  
217 Similar phylogenetic relationships for wildlife-origin PPRV genomes were seen using ML  
218 phylogenetic reconstruction (Fig 2).

219

## 220 **Phylogenetic analysis and TMRCA for PPRV emergence in Mongolian wildlife**

221           The five novel genomes from wild Mongolian ungulates were most closely related to PPRV  
222 from a Mongolian goat (KY888168.1) sampled in September 2016, the only PPRV genome sequence  
223 available from Mongolian livestock. There was strong support for monophyletic grouping of the  
224 Mongolian wildlife and livestock sequences using both ML and Bayesian inference methods (Figs 1  
225 and 2). There was also strong support for the grouping of all five Mongolian wildlife sequences and,  
226 although there was poor support for the clade structure within the Mongolian wildlife clade, in  
227 every analysis the Siberian ibex formed a sister branch to the four other wildlife sequences from  
228 saiga and the goitered gazelle (Figs 1, 2, S3). The Mongolian sequences lie within a strongly  
229 supported clade of lineage IV sequences from China, that includes livestock sequences from 2013-  
230 2015, and a Przewalski's gazelle sequence from 2018.

231           The dates of PPRV emergence in Mongolia and its wildlife were inferred using TMRCA  
232 analysis of the Bayesian time-scaled MCC tree shown in Fig 1A. The median TMRCA of the six  
233 Mongolian PPRV genomes was June 2015 (95% HPD: August 2014 – March 2016). The median date  
234 for the MRCA for the five Mongolian wildlife PPRV sequences was May 2016 (95% HPD: October

235 2015 – October 2016). The ancestor at the node linking all the Mongolian PPRV sequences with the  
236 most closely related Chinese sequences was dated to July 2013 (95% HPD: March 2013 – November  
237 2013). To check that the data partitioning for the trait analysis did not substantially alter the  
238 TMCRA analysis, an untraited phylogeny was also analysed, and gave very similar results (S2 Fig).

239

## 240 **Phylogeographic analysis of PPRV emergence in Mongolian wildlife**

241 SpreaD3 was used to visualise geographic spread inferred through discrete  
242 phylogeographic analysis and identify well supported rates using Bayes Factor tests. This found that  
243 PPRV spread from China into Mongolia was very strongly supported with a Bayes Factor of 494 and  
244 associated posterior probability of 0.96 (S3 Table).

245 To further explore and visualise phylogeographic patterns in the data, samples were  
246 geocoded and analysed using Microreact ([www.microreact.org](http://www.microreact.org)). Samples were geocoded at the  
247 highest resolution possible. GPS sampling locations were available for all Mongolian wildlife  
248 samples (Table 1), the Mongolian livestock sample and the 2008 bharal sequence from Tibet. Of the  
249 other 33 PPRV genomes within the Chinese 2013-2018 clade, 28 samples had province-level location  
250 data, hence region centroids were used for geocoding, while country-level location only was  
251 available for five sequences, in which case the China centroid was used. An open-access interactive  
252 dynamic visualisation of our global PPRV dataset, integrating phylogenetic, spatial, temporal and  
253 host (wildlife/livestock host) data is available at the permanent link  
254 <https://microreact.org/project/5WNeX14MRFvwe8YLhn5a1S/e2d5dafd> (and will be updated as  
255 further genomes become publicly-available).

256 The map highlights the proximity of the sampling locations for the wildlife and livestock  
257 PPRV genomes in the Western Mongolian provinces of Khovd and Gobi Altai, with <40km between  
258 the livestock sample and one of the saiga antelope sampled in Khovd near the Khar-Uls lake four  
259 months later (Fig 3). The Siberian ibex sample, from Tugrug soum of Gobi-Altai (Table 1), was

260 furthest from the sampling location of the Mongolian livestock (~355 km) and marginally closer to  
 261 the Chinese border than other detected cases.

262 The PPRV genomes KX421386.1 and KX421384.1, from December 2013, are closely  
 263 phylogenetically related to the Mongolian sequences, and also the geographically closest  
 264 sequences, from Xinjiang province of Northwest China, which borders Mongolia (Fig 3).

265

## 266 Amino acid polymorphisms associated with host range expansion

267 The five new PPRV sequences were compared with the 76 other genomes in our dataset in  
 268 order to identify polymorphisms of interest that might be associated with PPRV emergence in  
 269 Mongolian wildlife (Table 4).

270 **Table 4. Amino acid polymorphisms.**

| PPRV gene | AA position | Residue present            |      |         |                                  |                        |                                                                                 |
|-----------|-------------|----------------------------|------|---------|----------------------------------|------------------------|---------------------------------------------------------------------------------|
|           |             | Mongolian wildlife species |      |         | Mongolian livestock (KY888168.1) | China clade since 2013 | Other PPRV genomes                                                              |
|           |             | Saiga                      | ibex | Gazelle |                                  |                        |                                                                                 |
| H         | 112         | S                          | G    | S       | S                                | S                      | S in all                                                                        |
|           | 157         | R                          | R    | R       | R                                | K                      | K in all                                                                        |
|           | 244         | A                          | A    | A       | A                                | T                      | T in all                                                                        |
|           | 263         | L                          | L    | L       | F                                | L                      | F in LIII; L in all other genomes                                               |
|           | 315         | R                          | R    | R       | R                                | R                      | K in all                                                                        |
|           | 450         | K                          | K    | K       | K                                | K                      | G in two LIV sequences; S in two LI sequences; R in all others                  |
|           | 506         | D                          | D    | D       | N                                | D                      | D in all                                                                        |
|           | 546         | S                          | S    | S       | S                                | S                      | G in all                                                                        |
| F         | 66          | K                          | K    | K       | R                                | K                      | R in MG581412.1 (LIV); T in KR828813.1 (LIV); all others K                      |
|           | 518         | K                          | K    | N       | K                                | K                      | K in LIV; R in LI, LII & LIII (except K in LII EU267274.1)                      |
| P         | 137         | A                          | A    | A       | A                                | V                      | V is the consensus; a few sequences encode L, F or I                            |
|           | 285         | P                          | P    | P       | P                                | S                      | S in other LIV from Asia; L in LIV from Africa and Middle East & LI, LII & LIII |
|           | 509         | L                          | L    | L       | L                                | P                      | P in all; except L in two Middle Eastern LIV sequences                          |

|   |     |   |   |   |   |   |                                                        |
|---|-----|---|---|---|---|---|--------------------------------------------------------|
| V | 137 | A | A | A | A | V | V is the consensus; a few sequences encode L, F or I   |
|   | 285 | A | A | A | A | V | V in all                                               |
| N | 484 | N | N | N | K | N | T in four sequences (from LI and LIII); N in all other |

271 The amino acid sequences for each PPRV gene were compared between Mongolian, closely related  
 272 Chinese and other PPRV genomes to identify polymorphic sites. The amino acid positions and  
 273 encoded residues for identified polymorphic sites are shown. Under 'Other PPRV genomes',  
 274 lineages are referred to as LI, LII, LIII or LIV.  
 275

276 Among the polymorphisms observed, the Mongolian livestock PPRV (KY888168.1) encodes  
 277 asparagine (N) at position 506 of PPRV H, whereas every other sequence encodes aspartate (D) as  
 278 part of the completely conserved <sup>505</sup>DDD<sup>507</sup> motif. The PPRV H from Siberian ibex has a glycine (G)  
 279 at amino acid 112, whereas the other 80 sequences in the dataset encode serine (S). In addition, two  
 280 residues in H are unique to the Mongolian PPRV sequences, including the five wildlife and one  
 281 livestock sequence: arginine (R) instead of lysine (K) at amino acid 157, and hydrophobic alanine (A)  
 282 instead of hydrophilic threonine (T) at position 244. We also noted several sites within the H gene  
 283 where the monophyletic clade of 39 Chinese/Mongolian sequences encode common signature  
 284 residues compared other PPRV sequences, namely amino acids 315 (R), 450 (K) and 546 (S) (Table  
 285 4). For the F protein, PPRV from goitered gazelle was the only genome to encode asparagine (N) at  
 286 position 518, a significantly different residue from lysine (K) (in all other lineage IV genomes) or R  
 287 (lineages I, II and III).

288 Mongolian PPRV sequences encode alanine (A) at position 137 of their P and V proteins, a  
 289 residue not seen in any other PPRV isolate in the database (otherwise valine (V) is the consensus,  
 290 with a few sequences encoding L, F and I). Another polymorphism was seen at amino acid 285,  
 291 where proline (P) is seen only in the P proteins of Mongolian sequences instead of either Serine (S)  
 292 in other lineage IV PPRV from East and South Asia or leucine (L) in lineage IV viruses from Africa  
 293 and the Middle East as well as lineages I, II and III. This mutation lies after the RNA editing site,  
 294 leading to a different substitution in the V protein, with Mongolian sequences encoding alanine (A)



295 and all other sequences encoding valine (V) at amino acid 285, which lies close to the zinc-binding  
296 domain comprising amino acids 237-280.

297

## 298 **Molecular modelling of polymorphic amino acids in Mongolian PPRV H**

299 To determine the location of the polymorphic sites identified in PPRV H from Mongolian  
300 wildlife and livestock, structural homology modelling was performed, based the solved crystal  
301 structure of the head domain of MeV H in complex with SLAM, the host cell entry receptor for  
302 morbilliviruses [28]. Of the polymorphic sites identified between H sequences, sites 112 and 157  
303 were not captured by the crystal structure. Amino acid residues 244 and 263 were predicted to be  
304 distant from the SLAM binding interface and surface exposed (Fig 4A,B). Residues 506 and 546  
305 were predicted to lie within the region that forms the SLAM binding interface (Fig 4A,B). While  
306 amino acid site 546 of H is not thought to form a direct contact with SLAM, amino acid 506 lies  
307 between two residues (D505 and D507) which in MeV H form salt bridges to K77 and R90 of  
308 marmoset SLAM, comprising site 1 of the RBD (Fig 4C) [28]. Modelling caprine SLAM in place of  
309 marmoset SLAM reveals K78 in place of K77, whereas R90 in marmoset SLAM is replaced by R91 in  
310 caprine SLAM, with the preceding P90 facing away from PPRV H (Fig 4D). Replacing G506 of MeV H  
311 with D506 (i.e. the consensus residue in PPRV H) or N506 (i.e. the substitution seen in PPRV from  
312 Mongolian livestock) could affect the interaction with SLAM due to its proximity (Fig 4D,E,F).

313

## 314 **Selection pressure analysis**

315 To test for positive selection, methods were used that assess the numbers of non-  
316 synonymous (dN) to synonymous (dS) nucleotide substitutions per site, with  $dN > dS$  indicative of  
317 positive selection (i.e. adaptive evolution). To assess positive selection acting on individual codons,  
318 the CDS of each PPRV gene was analysed using MEME, FUBAR, FEL and CodeML. Sites under  
319 positive selection were identified in all genes with all four methods, except for the F gene (three  
320 methods), the C gene (two methods) and the M gene (one method) (Table 5, S4 Table). The amino

321 acid positions identified as evolving under positive selection by all four methods were amino acid  
 322 246 of the H protein, amino acid 616 of the L protein and amino acids 52 and 101 of the P and V  
 323 proteins. Of note, all methods except CodeML also identified positive selection acting on amino  
 324 acid 137 of the P and V proteins.

325 **Table 5. Amino acid sites under positive selection**

| <b>Protein</b> | <b>MEME</b>                                                                                                     | <b>FUBAR</b>                                                | <b>FEL</b>                                                                | <b>CodeML</b>               |
|----------------|-----------------------------------------------------------------------------------------------------------------|-------------------------------------------------------------|---------------------------------------------------------------------------|-----------------------------|
| <b>N</b>       | 46, 431                                                                                                         | 456                                                         | 211, 431, 467                                                             | 424, 456                    |
| <b>P</b>       | 10, 20, 28, 52, 79, 83, 92, 101, 102, 106, 111, 137, 161, 170, 171, 176, 269, 277, 284, 293, 295, 382, 425, 509 | 51, 52, 79, 101, 111, 137, 161, 171, 176, 295, 425          | 28, 51, 52, 71, 79, 101, 102, 111, 137, 161, 170, 171, 176, 284, 295, 425 | 52, 101                     |
| <b>C</b>       | 3,13, 36,150,154, 176                                                                                           | -                                                           | 150, 154, 176                                                             | -                           |
| <b>V</b>       | 10, 20, 28, 51, 52, 83, 101, 102, 111, 137, 161, 171, 176, 235, 269, 284, 295                                   | 28, 51, 52, 79, 101, 102, 111, 137, 161, 171, 176, 284, 295 | 28, 51, 52, 79, 101, 102, 111, 137, 161, 170, 171, 173,176, 221, 284, 295 | 52, 100, 101, 152, 275, 285 |
| <b>M</b>       | 311                                                                                                             | -                                                           | -                                                                         | -                           |
| <b>F</b>       | 3, 8, 11, 46, 145, 368, 530                                                                                     | 8                                                           | 8                                                                         | -                           |
| <b>H</b>       | 21, 210, 211, 245, 246, 288, 305, 330, 339, 476, 574                                                            | 246                                                         | 246, 476, 574                                                             | 246                         |
| <b>L</b>       | 54, 68, 113, 124, 230, 336, 349, 614, 616, 719, 720, 899, 1343, 1708, 1901, 2038, 2080, 2115                    | 614, 616, 1257                                              | 614, 616, 623, 1257                                                       | 616                         |

326 Each PPRV gene was tested for site-specific selection across the phylogeny using the four analysis  
 327 methods shown: Mixed Effects Model of Evolution (MEME), Fast Unconstrained Bayesian  
 328 Approximation (FUBAR), Fixed Effects Likelihood (FEL) and CodeML. Amino acid positions  
 329 identified as evolving under positive selection by each method are shown, using their default  
 330 threshold of significance ( $p \leq 0.05$  for CodeML,  $p \leq 0.1$  for MEME, FUBAR and FEL). Sites with  
 331 significance  $0.05 \leq p < 0.1$  are shown in italics. '-' indicates no positively selected sites were  
 332 identified for that gene using that method.  
 333

334 Methods for detecting lineage specific selection were also used to test whether the clade of  
 335 Mongolian and Chinese PPRV sequences since 2013 showed evidence of positive selection. Both  
 336 BUSTED and aBSREL found no evidence of selection for N, P, C, V, M, F or H genes but did find  
 337 evidence of positive selection acting on the L gene of the Mongolian/Chinese PPRV clade ( $p < 0.05$ )

338 (Table 6). The BUSTED result indicates L gene-wide episodic diversifying selection, i.e. evidence  
 339 that at least one site on at least one test branch within the clade has experienced diversifying  
 340 selection. aBSREL identified episodic diversifying selection acting on two branches, namely the  
 341 single Mongolian livestock PPRV sequence (KY888168.1) and the PPRV L gene from Chinese goat  
 342 (KP260624) (Table S5). FEL identified positively selected sites within each gene in the  
 343 Chinese/Mongolian clade (Table 6). Some sites were identified both by lineage specific FEL and  
 344 earlier by MEME in all but the C proteins, including position 137 in the P and V proteins (Table 5 and  
 345 6).

346 **Table 6. Lineage specific selection tests.**

| Protein  | BUSTED                                         | FEL                                                                                                                                                                                                                                                                   | aBSREL          |
|----------|------------------------------------------------|-----------------------------------------------------------------------------------------------------------------------------------------------------------------------------------------------------------------------------------------------------------------------|-----------------|
| <b>N</b> | -                                              | 46, 423, 426, 484                                                                                                                                                                                                                                                     | -               |
| <b>P</b> | -                                              | 45, <b>83</b> , 98,103, <b>106</b> , <b>137</b> ,<br>163, <b>176</b> , 233, 258, 263, <b>269</b> ,<br><b>295</b> , <b>382</b> , <b>509</b>                                                                                                                            | -               |
| <b>C</b> | -                                              | 91,129                                                                                                                                                                                                                                                                | -               |
| <b>V</b> | -                                              | 45, <b>83</b> ,103, 106, <b>137</b> ,163,<br><b>176</b> , 233, 263, <b>269</b> , <b>295</b>                                                                                                                                                                           | -               |
| <b>M</b> | -                                              | <b>311</b>                                                                                                                                                                                                                                                            | -               |
| <b>F</b> | -                                              | 187, 518, <b>530</b>                                                                                                                                                                                                                                                  | -               |
| <b>H</b> | -                                              | <b>21</b> , 112, 162, 244, <b>305</b> , <b>330</b> ,<br><b>339</b> , 394, 410, 438, 440, 506,<br>575, 590                                                                                                                                                             | -               |
| <b>L</b> | +<br>(LRT=18.64;<br>p= 4.5 x10 <sup>-5</sup> ) | <b>68</b> , 87, <b>113</b> , 121, <b>124</b> , 152,<br>277, 299, <b>336</b> , 485, 617, 647,<br>707, <b>719</b> , <b>720</b> , 723,1022,<br>1031, 1198, 1264, 1272,<br><b>1343</b> , 1375, 1452, 1622,<br>1656, 1715, <b>1901</b> , 1990,<br>2010, <b>2038</b> , 2089 | + (see Table 7) |

347 The clade of China/Mongolia sequences was selected as foreground branches on which to test for  
 348 positive selection using the three analysis methods shown: Branch-Site Unrestricted Statistical Test  
 349 for Episodic Diversification (BUSTED), Fixed Effects Likelihood (FEL) and adaptive Branch-Site  
 350 Random Effects Likelihood (aBSREL). '-' denotes no evidence of positive selection, as assessed  
 351 using the Likelihood Ratio Test (LRT) using the default threshold of significance for BUSTED and  
 352 aBSREL ( $p \leq 0.05$ ). For FEL, amino acid sites identified as under positive selection are indicated  
 353 (using the default threshold of significance of  $p \leq 0.1$ ). Sites with significance  $0.05 \leq p < 0.1$  are  
 354 shown in italics. Sites in bold were also identified by MEME in phylogeny-wide testing.  
 355

356            Eight sites at which Mongolian PPRV-specific amino acid polymorphisms had been noted in  
357 either wildlife or livestock (Table 4) were also identified as positively selected by the lineage-specific  
358 FEL analysis (Table 6), suggesting functional significance of these sites, namely H\_112, H\_244,  
359 H\_506, F\_518, P\_137, P\_509, V\_137 and N\_484.

360

361

362

363

364

## 365 Discussion

366 Despite the broad host tropism and impact of PPRV across wild ungulate species, there is a  
367 paucity of wildlife-origin PPRV genomes which, along with the lack of field epidemiological data,  
368 has hindered understanding of viral evolution and dynamics at the wildlife-livestock interface. This  
369 understanding is critical in order to design effective disease control and eradication strategies and  
370 thereby support the success of the PPR Global Eradication Programme (GEP) and mitigate the  
371 threat of PPRV to both domestic and wild ungulates. In this study, full PPRV genomes were  
372 generated from three Mongolian saiga antelope, one goitered gazelle and one Siberian ibex that  
373 were part of a major mortality event in Mongolian wildlife in 2016-2017. These were analysed  
374 together with a curated set of all other genomes available in GenBank, to examine PPRV evolution  
375 and cross-species transmission. This showed strong support for monophyletic grouping of genomes  
376 from Mongolian wildlife and livestock, and for incursion of PPRV into Mongolian from China. Our  
377 TMRCA analysis also indicated that PPRV emerged in Mongolia's endangered wildlife populations  
378 before livestock vaccination was initiated, and sequence polymorphisms and signatures of adaptive  
379 evolution were identified.

380 Prior to our phylogenetic analysis, recombination detection algorithms were applied to our  
381 dataset and identified several potential recombinant PPRV genomes. Recombination has never  
382 been reported for PPRV and is rare among negative sense RNA viruses [46, 47]. However,  
383 bioinformatics errors or laboratory contamination can lead to false signals of recombination in  
384 PPRV [39, 48]. Previous reports have also highlighted the issue of contamination in published PPRV  
385 sequences [33, 39, 48, 49], so the most probable explanation is that the recombinant PPRV  
386 genomes we identified are the result of laboratory contamination during the process of genome  
387 sequencing. However, PPRV recombination cannot be totally ruled out and should be further  
388 explored in dedicated infection experiments. The inclusion of dubious and/or recombinant genomes  
389 in earlier phylogenomic studies may have influenced their results [38, 39, 41, 42], and we therefore  
390 first analysed PPRV molecular evolution globally.

391 The genome-wide mean evolutionary rate inferred from the Bayesian MCC phylogeny of 81  
392 PPRV genomes was  $9.22E-4$  nucleotide substitutions/site/year (95% highest posterior density (HPD)  
393 interval:  $6.78E-4$  -  $1.17E-3$ ), which is comparable to previous estimates [38, 39]. The TMRCA and  
394 country of origin of each of the PPRV lineages were inferred from our Bayesian MCC phylogeny  
395 (Table 2). In the case of lineage IV, which is becoming the predominant lineage globally, the median  
396 TMRCA was estimated as 1975 (95% HPD: 1961-1985). This median date is slightly earlier than that  
397 reported by Muniraju et al. using a more limited dataset of twelve genomes (1987), although the  
398 HPD intervals overlap, or from partial N or F gene datasets [38, 50], and broadly equivalent to  
399 estimates obtained from analysis of 53 full genomes (1968) [42].

400 All phylogeographic analyses are affected by sampling bias. Our analysis indicates with  
401 moderate support that the country of origin of lineage IV was Nigeria, with the second most  
402 supported origin in Benin. Previous analyses identified India as the most likely origin of lineage IV,  
403 but recent sequences from Nigeria were not included in that analysis [38]. The extremely poor  
404 sampling prior to the 1990s means that whilst an origin of lineage IV in Africa seems plausible, we  
405 do not believe that there is sufficient resolution of genomic sequences to robustly establish the  
406 country of origin. However, the detection of lineage IV PPRV in livestock in Cameroon in 1997, in  
407 the Central African Republic in 2004 and in several other Northern and Eastern African countries in  
408 the early 2000s, in the absence of known animal movement from Asia [33, 34, 51, 52], also supports  
409 the hypothesis that lineage IV may have emerged in Africa before spreading to the Middle East and  
410 Asia and then re-emerging in African countries. Additional full genomes for lineage IV viruses from  
411 Africa, both historical and contemporary, would improve the phylogenetic power for more robust  
412 testing of this hypothesis.

413 Phylogenetic relationships between wildlife and livestock origin PPRV were assessed across  
414 the global phylogeny. With the exception of the Mongolian wildlife clade, all wildlife sequences  
415 occur as isolated sequences within the broader livestock diversity. This is consistent with repeated  
416 dead-end spillovers of PPRV from livestock into wildlife, but the lack of sequences from wildlife,

417 long branches and geographic distances between the most related livestock and wildlife sequences  
418 makes it impossible to rule out transmission from largely undetected outbreaks in wildlife into  
419 livestock. No additional PPRV genomes were available from UAE, Iraq or Israel, although 18 full  
420 genomes from livestock in Israel between 1997-2004 were sequenced previously, but unfortunately  
421 not made publicly available [42]. More dense sampling of PPRV genomes globally would likely  
422 correct sampling bias and help reveal that viruses from wild and domestic hosts cluster together  
423 according to geographic location, as seen for China and Mongolia (Figs 1 and 2), and indicated by  
424 partial N gene analysis [53].

425         The novel PPRV genomes from Mongolian wildlife were most closely phylogenetically  
426 related to the PPRV genome from Mongolian livestock, strongly supported in both Bayesian (Fig 1)  
427 and ML (Fig 2) phylogenies. Although this might be expected, it was not evident in earlier analysis,  
428 which showed closer phylogenetic proximity of saiga-origin PPRV to Chinese livestock as opposed  
429 to Mongolian livestock sequences, owing to insufficient phylogenetic resolution of partial N gene  
430 sequence data used (255 nucleotides) [17]. China is the only other country for which both wildlife  
431 and livestock genomes are available, with phylogenetic analysis showing PPRV from Przewalski's  
432 gazelle embedded, albeit with poor node resolution, within a well-supported clade of 32 livestock  
433 viruses sampled since 2013.

434         Our study is the first to sequence multiple PPRV genomes from an outbreak in wildlife.  
435 Taking advantage of this, the full PPRV genome available for Mongolian livestock [40] and the  
436 dense sampling of PPRV genomes in China since 2013 [41] we examined PPRV emergence in  
437 Mongolian wildlife. The six Mongolian PPRV genomes formed a monophyletic group within a large  
438 clade (n=39) that includes lineage IV PPRV from China sampled since 2013 (Figs 1 and 2). In China,  
439 the first PPR outbreak was in Tibet in 2007-2008 and there were subsequently no reports of PPR  
440 until its re-emergence in Xinjiang province in November 2013 [54]. PPRV from China in 2007/2008  
441 (n=4 genomes) was more closely phylogenetically related to viruses from India (spanning 2014-  
442 2016) than to the PPRV in China since 2013, consistent with earlier reports [41, 54]. Statistical

443 testing of the Bayesian analysis of full genomes provided very strong phylogenetic support that  
444 PPRV spread into Mongolia from China (Bayes Factor: 494; posterior probability: 0.96), although  
445 the lack of surveillance or genomic sequencing from other neighbouring countries (e.g.,  
446 Kazakhstan, Russia) means that we cannot exclude introduction via an intermediary location.  
447 Phylogeographic visualisation using Microreact showed that PPRV genomes closely related to  
448 Mongolian PPRV were from livestock in Xinjiang province. Incursion of PPRV from Xinjiang province  
449 would be consistent with epidemiological reports that initial livestock cases and the earliest  
450 suspected wildlife cases clustered at the southwestern Mongolia-China border [17, 43]. Between  
451 2013 and 2016, PPRV cases in Argali sheep, *Capra ibex* and goitered gazelle have been confirmed  
452 across six different counties within Xinjiang province, where shared grazing provides opportunity  
453 for cross-species transmission [10, 12]. Owing to the presence of multiple PPRV-susceptible wild  
454 ungulate species in Xinjiang [55] and its extensive national borders (with Mongolia, Kazakhstan,  
455 Kyrgyzstan, India, Pakistan, Russia, Afghanistan and Tajikistan and Afghanistan), Xinjiang should  
456 be a focus for increased surveillance and sampling of PPRV across the wild and domestic ungulate  
457 community.

458         The TMRCA of the clade of Mongolian PPRV genomes (one livestock and five wildlife) in our  
459 analysis was June 2015 (95% HPD: August 2014 – March 2016). The TMRCA linking the Mongolian  
460 to the Chinese genomes was inferred as July 2013 (95% HPD: March 2013 – November 2013). The  
461 introduction of PPRV into Mongolia likely occurred between the TMRCA estimates for these two  
462 nodes. Therefore, the very latest date of emergence in the country that is consistent with the  
463 phylogenetic analysis is March 2016 (with 95% probability). This suggests that PPRV was circulating  
464 undetected for minimum of six months before the first reported PPR outbreak in Mongolia, which  
465 was reported in livestock in Khovd province in August 2016 (notified to OIE in September 2016,  
466 Notification report REF OIE 20934). The TMRCA analysis indicates a median date for PPRV  
467 emergence in Mongolian wildlife of May 2016 (95% HPD: October 2015 – October 2016). This  
468 suggests that PPRV infections in wildlife may have pre-dated the first confirmed wildlife case in late



469 December 2016, as proposed earlier based on interview data and undiagnosed wildlife mortalities  
470 [17, 43]. However, more genomic sequencing of PPRV detections in livestock during 2015 to 2016 in  
471 this region is required to confirm this, as it is possible that 'missing' livestock sequences would  
472 intersperse with the (currently monophyletic) wildlife clade, thereby changing this interpretation.  
473 Pruvot et al. reported that earliest suspected unconfirmed cases in Mongolian wildlife occurred in  
474 Siberian ibex in July/August 2016 [17]. All wildlife PPRV genomes in our analysis date from January  
475 2017 and the clade branching structure is poorly supported in our analyses, thus no inference can be  
476 made regarding the relative timing of emergence among different wildlife species. Interestingly,  
477 however, phylogenetic reconstruction consistently showed PPRV from Siberian ibex located on a  
478 sister branch to the saiga and goitered gazelle viruses (Figs 1, 2, S2). If the phylogenetic separation  
479 observed correctly captures true patterns of ancestry, phylogenetic separation could be related to  
480 (i) some structuring of the virus between wild species, potentially related to a longer period of  
481 transmission and evolution in ibex consistent with earlier emergence in this species, and/or (ii) the  
482 phylogenetic structure seen could be related to geographical separation of the ibex sample, which  
483 was further southeast than the other sampling sites.

484         Based on epidemiological and ecological evidence, multiple spillover events from livestock  
485 to different wildlife populations during the Mongolian outbreak have been proposed [17]. The lack  
486 of additional livestock-origin genomes means that this cannot currently be confirmed using  
487 phylogenetic approaches, although our data are compatible with the hypothesis of spillover from  
488 domestic into wild ungulates in Mongolia. Our TMRCA analyses suggest that transmission of PPRV  
489 at the livestock-wildlife interface occurred prior to, or at the latest contemporaneous with, the  
490 livestock vaccination campaign which began in October 2016. This could explain emergence in  
491 wildlife despite vaccination of ~10.4 million small ruminant livestock in Mongolia's Western  
492 provinces, without inferring inadequacies in vaccination coverage or seroconversion [43].

493         At the time of the disease outbreak, it is clear that the PPRV infecting wildlife was not only  
494 virulent but already well-adapted for infection and transmission in these hosts, at least in saiga

495 antelope. It is possible that mutations present in the wildlife-infective PPRV strains, or their  
496 ancestral viruses, contributed to this, and therefore genomic sequences were analysed for notable  
497 sequence features and signatures of adaptive evolution. The genomes from Mongolian wildlife, as  
498 well as from Mongolian livestock and all PPRV from China since 2013, have a six nucleotide insertion  
499 in the 5'UTR of the F gene, which renders the genome 15,954 nucleotides long, instead of 15,948  
500 nucleotides in all other PPRV strains [12, 40, 41, 56]. This insertion maintains the 'rule of six', i.e.  
501 that genome length is a multiple of six, which is necessary for efficient replication of members of  
502 the *Paramyxoviridae* family [57]. Comparing the nucleotide sequence at the insertion site shows  
503 that this is much more cytosine rich in lineage IV viruses and that a tract of six cytosines is present  
504 directly upstream of the insertion site in PPRV from sister clades to the Mongolia/China clade (S1  
505 file alignment). Insertions in measles virus genomes are thought to arise via polymerase slippage  
506 errors when transcribing homopolymeric regions [58], suggesting a similar mechanism may have  
507 occurred in an ancestor to the 2013 China PPRV clade, and the resulting insertion has been  
508 maintained in the Mongolian PPRV. Interestingly, six nucleotide insertions in the 5'UTR of the F  
509 gene were also reported in goat-adapted rinderpest virus vaccine strains [59]. Similarly, several  
510 variants of measles virus have been identified with a net gain of six nucleotides within the M-F UTR  
511 and possibly associated with lineage emergence [60, 61]. In light of these reports, and the ability of  
512 the PPRV-F 5'UTR to enhance F gene translation [62], experiments to address the functional  
513 consequences, and potential selective advantage, of the observed insertion in the Mongolian and  
514 Chinese PPRV should be prioritised.

515         The CDS of each PPRV gene was assessed for non-synonymous nucleotide changes and  
516 these were correlated with the results of selection pressure analyses using multiple methods.  
517 Positive selection in viral genomes indicates adaptive evolution in response to changing fitness or  
518 functional requirements [63, 64], including infection and replication in novel hosts and evasion of  
519 host innate and adaptive immune responses, and is most likely at interaction interfaces between  
520 viral and host cell molecules.

521 For the H and F envelope entry proteins, polymorphisms specific to Mongolian wildlife  
522 PPRV were present at amino acid 112 in H from Siberian ibex and at amino acid 518 in F from  
523 goitered gazelle, with both sites under lineage-specific positive selection (Table 4, Table 6). More  
524 PPRV genomes would clearly be needed to assess the possibility that these are host species-specific  
525 mutations. Of note, however, are two polymorphisms in H which are specific to the six PPRV  
526 genomes from Mongolian livestock and wildlife, namely R157 (instead of K157 in all 76 other  
527 genomes) and A244 (instead of T244 in all 76 other genomes), raising the possibility that these  
528 substitutions may have helped PPRV spillover to wildlife. Whereas K157R is not a major change in  
529 physiochemical or steric properties of the amino acid, the change from the polar, uncharged amino  
530 acid threonine (T) to hydrophobic alanine (A) at position 244 of the Mongolian PPRV H protein  
531 could have more significant effects on inter-molecular interactions. The adjacent residues 234-243  
532 form a predicted T cell epitope [65] and therefore one possibility is that T244A influences  
533 interactions with MHC I. This region of H is also subject to adaptive evolution: site 244 is detected as  
534 under positive selection in the China/Mongolia lineage using FEL methods, site 245 is detected by  
535 MEME as under episodic positive selection and site 246 is identified by all four methods in  
536 phylogeny-wide testing (Table 5), and was also reported previously as a positively selected site [66].  
537 The single genome from Mongolian livestock has two substitutions in H, L263F and D506N, which  
538 are not shared by the five wildlife-origin PPRV and should be assessed in other livestock samples. If  
539 consistently seen, D506N is particularly noteworthy since it lies at the SLAM binding interface (Fig  
540 4) and all other PPRV strains encode aspartate (D) at this site [24]. Neighbouring residues 505N and  
541 507N are completely conserved among morbilliviruses [24], and comprise site 1 of the RBD (Fig 4),  
542 forming salt bridges to SLAM in the crystal structure for MeV H [28] and in homology models for  
543 PPRV H [4, 66]. Therefore this residue could be functionally important for infectivity and viral  
544 tropism. Substitutions already present in the Chinese lineage of PPRV since 2013 may also have  
545 contributed to emergence in Mongolian wildlife, including unique residues at sites 315, 450 and 546  
546 of the H protein. At position 546, all sequences from the Mongolia/China clade encode serine, as

547 does MeV at the equivalent position, whereas every other PPRV strain in the phylogeny encodes  
548 glycine. This residue is located adjacent to hydrophobic site 4 of the RBD (Fig 4) but is not thought  
549 to form a direct contact with SLAM [28].

550 The P and V proteins antagonise the interferon (IFN) response via intermolecular  
551 interactions with host STAT1, STAT2, Tyk2 and Jak1 proteins [67-69]. Potentially, Mongolian PPRV-  
552 specific residues in the P (137, 285, 509) and V proteins (137, 285), particularly those under positive  
553 selection (i.e. 137 in P and V; 509 in P) might affect evasion of host innate immunity and emergence.  
554 In addition to its role in genome encapsidation and replication, the N protein was shown recently  
555 also to inhibit type I IFN by binding IRF3 [70]. We identified residues 46 and 426 in N as positively  
556 selected, with both MEME and FEL (Tables 5 and 6), as well as a Mongolian livestock-specific  
557 residue and lineage-specific positive selection at site 484 (Tables 4 and 6). The L gene, although  
558 lacking any Mongolian-PPRV specific polymorphisms, was the only gene identified as positively  
559 selected by all three methods when the China/Mongolia clade was tested (Table 6), suggesting this  
560 catalytic polymerase protein has undergone adaptive evolution in this clade. Functional studies  
561 including pseudotyping (to assess receptor usage), minigenome (to assess replication), immune  
562 reporter and intermolecular binding assays are beyond the scope of the current study but should be  
563 planned to define the role of the mutations identified here in lineage IV PPRV expansion.

564 In summary, our study has provided insights into PPRV transmission at the livestock-wildlife  
565 interface. More PPRV full genomes are required in order to strengthen molecular epidemiological  
566 studies. The occurrence of cases in wildlife should serve as a trigger to initiate local  
567 surveillance/sampling in livestock and the surveillance and opportunistic sampling for wildlife  
568 disease events should be increased. However, quantifying the direction and extent of pathogen  
569 transmission in multi-host systems is challenging, even in the case of extremely detailed  
570 longitudinal study systems with pathogen genomic and host life history data [71]. There is thus a  
571 need for other types of data, including interspecific contact rates and pathways, and enhanced  
572 epidemiological and serological data, to enable approaches which integrate these with genomics

573 [71-73] and can lead to improved understanding of interspecific PPRV transmission dynamics and  
574 the epidemiological roles of wildlife species.

575

## 576 **Materials and Methods**

### 577 **Sample collection**

578 Samples from five wild Mongolian ungulates suspected of being infected with PPRV were all  
579 collected in January 2017 during an emergency field mission to urgently respond, assess and advise  
580 the Mongolian Government through the National Emergency Committee. The mission involved  
581 FAO's Crisis Management Centre-Animal Health (CMC-AH), the Wildlife Conservation Society, the  
582 Royal Veterinary College (RVC), the Veterinary and Animal Breeding Agency (VABA) and the State  
583 Central Veterinary Laboratory (SCVL) [43]. Tissues were collected from fresh carcass necropsies  
584 from three saiga antelope, one goitered gazelle and one Siberian ibex. GPS locations of sampled  
585 animals are provided in Table 1. Total RNA was extracted from tissues using a NucleoSpin RNA  
586 Virus mini kit (Macherey-Nagel, 740956) at SCVL, Ulaanbaatar. Samples were then imported to  
587 RVC under APHA and CITES import permits.

588

### 589 **RT-PCR**

590 One-step RT-PCR was performed on 2ul total RNA using the SuperScript IV One-Step PCR kit  
591 (ThermoFisher, Catalog No. 12594025) either to amplify nucleotides 1232-1583 of the PPRV N gene  
592 using published primers NP<sub>3</sub> and NP<sub>4</sub> (Couacy-Hymann et al 2002) or to amplify the full length H  
593 gene (with primers 5'-CTCCACGCTCCACCACAC-3' and 5'-CTCGGTGGCGACTCAAGG-3') or the full  
594 length F gene (with primers 5'-GCTATGCGGCCGCACCATGACGCGGGTCGCAATYTT-3' and 5'-  
595 GGTGAGGATCCCTACAGTGATCTTACGTACGAC-3').

596

### 597 **Whole genome next generation sequencing**

598 Total RNA from tissues was converted to cDNA with SuperScript IV and sequencing libraries  
599 prepared with the Nextera XT DNA Library Preparation Kit (Illumina, FC-131-1024). Sequencing was  
600 performed using the Illumina NextSeq platform with 150bp paired-end reads. Sequencing data was  
601 mapped to a reference PPRV genome using BWA [74] and then consensus calling was performed  
602 using SAMtools [75]. This was corroborated by removing host reads and then undertaking *de novo*  
603 assembly with SPAdes [76], and then both outputs were aligned to confirm PPRV genome  
604 sequences.

605

### 606 **PPRV full genome dataset curation and recombination analysis**

607 In addition to the five novel PPRV genomes, all full PPRV genomes available in Genbank were  
608 downloaded (last accessed 22/11/2020). Vaccine sequences were removed from the dataset, as well  
609 as one sequence noted in GenBank as multiply passaged in cell culture (MN369543.1). Sequence  
610 alignment was performed using MAFFT [77] in the Geneious software package, followed by manual  
611 editing. TempEst was run to assess temporal signal in the data and evidenced clock-like evolution  
612 (S<sub>3</sub> Fig) [78]. TempEst also identified an outlier sequence (KJ867543.1, lineage III) that was removed  
613 prior to phylogenetic analysis. The alignment of 84 PPRV genomes was then analysed using the  
614 Recombination Detection Program (RDP) version 4.101 [79], using seven different recombination  
615 detection methods (RDP, GENECONV, BootScan, MaxChi, Chimaera, SiScan and 3Seq) and default  
616 settings. Signatures of recombination were detected in three sequences  
617 (KR828814.1/goat/Nigeria/2012-05-09, KJ867541.1/goat/Ethiopia/2010 and  
618 KT633939.1/ibex/China/2015-01-20) using all seven detection algorithms ( $p < 0.01$ ) (S<sub>2</sub> Table). These  
619 are most likely the result of laboratory contamination [47] and these sequences were considered  
620 unreliable and removed from our dataset, leaving a total of 81 PPRV genomes (alignment provided  
621 in S<sub>1</sub> File).

622

### 623 **Phylogenetic analysis**

624 The General Time Reversible (GTR) nucleotide substitution model with gamma-distributed variable  
625 rates (G) and some invariable sites (+I) best fitted our dataset, according to the Bayesian Information  
626 Criterion (BIC) values calculated using MEGA7 [80]. Maximum likelihood (ML) phylogenetic  
627 reconstruction was performed using PhyML with a GTR nucleotide substitution model and 100  
628 bootstrap replicates. Phylogenetic analysis was also performed using a Bayesian Markov Chain  
629 Monte Carlo (MCMC) framework using BEAUti and BEAST v1.10.4 [81] and run via the CIPRES  
630 server. Prior to traiting the sequences, marginal likelihood estimation was performed using path  
631 sampling/stepping-stone sampling to choose the most appropriate combination of tree model  
632 (coalescent constant size or coalescent GMRF Bayesian skyride) and clock models (strict or  
633 uncorrelated relaxed) using a GTR nucleotide substitution model (4 gamma categories, estimated  
634 base frequencies and no codon partitioning). MCMC outputs from different runs were evaluated  
635 and convergence confirmed using Tracer v1.7.1 [82]. A model with a coalescent constant size tree  
636 prior and uncorrelated relaxed clock (lognormal distribution) [83] was determined to be the best fit  
637 for the data, based on the log marginal likelihood estimates from path sampling/stepping-stone  
638 sampling. This model of nucleotide evolution was used for subsequent analysis of the discrete traits,  
639 'host category (livestock or wildlife)' and 'country'. Asymmetric substitution models were selected  
640 for the discrete traits since these are the biologically more plausible scenario of virus transmission.  
641 Bayesian Stochastic Search Variable Selection (BSSVS) was also used, which limits the number of  
642 rates to those which adequately explain the phylogenetic diffusion process. At least two  
643 independent MCMC chains, of 40 million steps each, were performed for each analysis, and Tracer  
644 v1.7.1 was used to confirm that the MCMC chains converged at the same level and assess effective  
645 sample sizes (ESS). LogCombiner was used to combine the output of the independent BEAST runs  
646 to generate tree and log files for analysis. Maximum clade credibility (MCC) trees were generated  
647 using TreeAnnotator v1.10.4, and Figtree v1.4.4 was used to visualise and interpret MCC trees and  
648 derive TMRCA estimates. Evolutionary rates (ucl.d.mean) were taken from the combined log files  
649 analysed in Tracer v1.7.1. MCC trees and geocoded metadata were imported into Microreact to

650 visualise temporal and geographic spread [84]. The MCC tree and log files from the BEAST analysis  
651 were uploaded to the SpreaD3 software (Spatial Phylogenetic Reconstruction of Evolutionary  
652 Dynamics using Data-Driven Documents (D3) [85], in order to visualize the output from the BSSVS  
653 procedure and compute Bayes Factors for transitions. For country transitions, each country was  
654 assigned one latitude and longitude coordinate, either the precise sampling location for those  
655 countries with a single PPRV sequence in the dataset (Kenya, Tibet, Ghana), the GPS location  
656 of the saiga3 sample for Mongolia, or the country centroid coordinates (worldmap.harvard.edu)  
657 for other countries with >1 sequence.

658

### 659 **Detection of selection pressures**

660 Multiple analysis methods were implemented to detect positive selection in our phylogeny. Fast  
661 Unconstrained Bayesian Approximation (FUBAR, [86]) and Fixed Effects Likelihood (FEL, [87]) both  
662 available in data monkey.org [88] were used to detect positive selection at individual sites across the  
663 whole PPRV phylogeny. Mixed Effects Model of Evolution (MEME, [89]) analysis was also  
664 performed on datamonkey.org, with the capability to identify sites under episodic selection (i.e. in  
665 a subset of branches) as well as under pervasive selection [64, 89]. In addition, the ratio of non-  
666 synonymous to synonymous nucleotide substitutions ( $\omega = dN/dS$ ) was estimated for different  
667 selection models (in which the  $\omega$  ratio varies among codons) using CodeML as implemented in  
668 EasyCodeML [90]. The model M7 (beta; no positive selection) was compared to the model M8  
669 (beta& $\omega$ ; positive selection) for each gene using likelihood ratio tests (LRTs) [91, 92] (S4 Table). If  
670 model M8 was more likely than M7, the Bayes empirical Bayes (BEB) method [93] was used to  
671 calculate the posterior probabilities for site classes and identify sites under positive selection.  
672 Finally, three methods were implemented in datamonkey.org to detect lineage-specific selection,  
673 using user-defined PhyML maximum likelihood trees and alignments for the CDS of each gene. The  
674 monophyletic clade of Mongolian/Chinese sequences was selected *a priori* to test for selection  
675 acting on these branches. Adaptive Branch-Site Random Effects Likelihood (aBSREL, [94]) was



676 used to detect branches under positive selection. Branch-Site Unrestricted Statistical Test for  
677 Episodic Diversification (BUSTED, [95]) was also used to test for gene wide lineage-specific positive  
678 selection. Specific sites under selection in the selected clade were identified using Fixed Effects  
679 Likelihood (FEL, [87]).

680

## 681 **Protein homology modelling**

682 The predicted structures of PPRV Hs were modelled by submitting the amino acid sequences of  
683 each H to the SWISS\_MODEL automated protein structure homology modelling server in  
684 “alignment” mode [96]. Structures were visualised from the .pdb files using Swiss-pdb viewer.

685

## 686 **Figure captions**

687 **Fig 1. Bayesian time-scaled Maximum Clade Credibility Trees using country (A) or host category**  
688 **(B) partitions.**

689 Bayesian phylogenetic analysis (n=81 genomes) was run using BEAST v1.10.4 and trees are the  
690 combined output of three (A) or two (B) independent MCMC chains, visualized in FigTree. x-axis  
691 shows date. Branches are colour-coded by country (A) or host (B) as inferred using discrete trait  
692 analyses. Lineages, referred to as LI, LII, LIII or LIV, are shown. Arrows to the x-axis in (A) show  
693 ancestral nodes and corresponding TMRCA for different lineages. \* indicates posterior probability  
694 > 0.9 at the node opposite.

695

696 **Fig 2. Maximum likelihood phylogeny of PPRV genomes.**

697 81 PPRV genomes were analysed using PhyML with a GTR nucleotide substitution model and 100  
698 bootstrap replicates. The novel genomes from this study are shown in blue. Lineages, referred to as  
699 LI, LII, LIII or LIV, are shown. Scale bar shows nucleotide substitutions per site. \* indicates bootstrap  
700 proportion > 0.9 at the node opposite.

701

702 **Fig 3. Phylogeographic visualization.**

703 An MCC phylogenetic tree (81 sequences) was uploaded to Microreact together with geocoded  
704 locations of PPRV genomes and metadata to produce the dynamic visualization of phylogenetic,  
705 spatial and temporal relationships of the global PPRV dataset. The figure shows one view available  
706 at the Microreact project link  
707 (<https://microreact.org/project/5WNeX14MRFvwe8YLhn5a1S/e2d5dafd>), showing the location (A),  
708 phylogenetic relationship (B) and timeline (C) for the clade of PPRV genomes from Mongolia and  
709 China since 2013. Symbol colour denotes country of origin (Mongolia in green and China in blue).  
710 The symbol shape denotes different resolutions of geocoding for genomes: stars denotes samples  
711 with GPS coordinates; triangles denote region centroids; squares denote country centroids and a  
712 circle on the map view indicates multiple genomes from the same location. The ringed samples in  
713 panels (A)-(C) show samples from Xinjiang province, including KX421386.1 and KX421384.1. The  
714 map shown in (A) uses base map and data from OpenStreetMap and OpenStreetMap Foundation,  
715 available under the [Open Database License](#), with tiles from the [Mapbox mapping platform](#), used via  
716 the freely-available Microreact application.

717

718 **Fig 4. Homology modelling of the PPRV H-SLAM complex.**

719 Modelling was performed using SWISS\_MODEL using the published crystal structure of MeV H  
720 bound to marmoset SLAM to show positions of Mongolian-specific amino acid polymorphisms in  
721 PPRV H. Side (A) and top (B) orthogonal views of PPRV H bound to caprine SLAM (capSLAM)  
722 showing residues for PPRV H from saiga antelope (244A, 263L, 506D, 546S). Residues at site 1 of  
723 the RBD for (C) MeV H and marmoset SLAM (maSLAM), (D) PPRV H 506D and capSLAM, (E) PPRV  
724 H 506N and capSLAM, or (F) overlaid image of panels C and D. H proteins are shown in purple and  
725 SLAM proteins in turquoise.

726

727 **Acknowledgements**

728 Support for field sample collection and multi-sectoral coordination was provided by the Wildlife  
729 Conservation Society, the Morris Animal Foundation's Betty White Wildlife Rapid Response Fund,  
730 the FAO Crisis Management Centre-Animal Health and through the Science for Nature and People  
731 Partnership (SNAPP), a partnership of The Nature Conservancy, the Wildlife Conservation Society  
732 (WCS), and the National Center for Ecological Analysis and Synthesis (NCEAS) at University of  
733 California, Santa Barbara.

734 Special thanks to Khovd and Gobi-Altai Province Veterinary Agencies for their generous support for  
735 wildlife field investigations and response, and to Dr. Munkhbaatar Batsukh and Dr. Burenbayasakh  
736 Ravdan for their support.

737

738

739

## 740 References

- 741 1. Aziz Ul R, Wensman JJ, Abubakar M, Shabbir MZ, Rossiter P. Peste des petits ruminants in  
742 wild ungulates. *Trop Anim Health Prod.* 2018;50(8):1815-9. Epub 2018/06/09. doi: 10.1007/s11250-  
743 018-1623-6. PubMed PMID: 29881925.
- 744 2. Fine AE, Pruvot M, Benfield CTO, Caron A, Cattoli G, Chardonnet P, et al. Eradication of  
745 Peste des Petits Ruminants Virus and the Wildlife-Livestock Interface. *Front Vet Sci.* 2020;7:50.  
746 Epub 2020/04/02. doi: 10.3389/fvets.2020.00050. PubMed PMID: 32232059; PubMed Central  
747 PMCID: PMC7082352.
- 748 3. Munir M. Role of wild small ruminants in the epidemiology of peste des petits ruminants.  
749 *Transbound Emerg Dis.* 2014;61(5):411-24. Epub 2013/01/12. doi: 10.1111/tbed.12052. PubMed  
750 PMID: 23305511.
- 751 4. Dou Y, Liang Z, Prajapati M, Zhang R, Li Y, Zhang Z. Expanding Diversity of Susceptible  
752 Hosts in Peste Des Petits Ruminants Virus Infection and Its Potential Mechanism Beyond. *Front Vet*  
753 *Sci.* 2020;7:66. Epub 2020/03/18. doi: 10.3389/fvets.2020.00066. PubMed PMID: 32181263; PubMed  
754 Central PMCID: PMC7059747.
- 755 5. Weinberg P, Ambarli H. *Capra aegagrus*. The IUCN Red List of Threatened Species 2020:  
756 e.T3786A22145942. <https://dx.doi.org/10.2305/IUCN.UK.2020-2.RLTS.T3786A22145942.en>.  
757 Downloaded on 22 April 2021. 2020.
- 758 6. Michel S, Ghoddousi A. *Ovis vignei* (errata version published in 2021). The IUCN Red List of  
759 Threatened Species 2020: e.T54940655A195296049. [https://dx.doi.org/10.2305/IUCN.UK.2020-](https://dx.doi.org/10.2305/IUCN.UK.2020-2.RLTS.T54940655A195296049.en)  
760 [2.RLTS.T54940655A195296049.en](https://dx.doi.org/10.2305/IUCN.UK.2020-2.RLTS.T54940655A195296049.en). Downloaded on 22 April 2021. 2020.
- 761 7. Marashi M, Masoudi S, Moghadam MK, Modirrousta H, Marashi M, Parvizifar M, et al. Peste  
762 des Petits Ruminants Virus in Vulnerable Wild Small Ruminants, Iran, 2014-2016. *Emerg Infect Dis.*  
763 2017;23(4):704-6. Epub 2017/03/23. doi: 10.3201/eid2304.161218. PubMed PMID: 28322692;  
764 PubMed Central PMCID: PMC5367395.

- 765 8. Hoffmann B, Wiesner H, Maltzan J, Mustefa R, Eschbaumer M, Arif FA, et al. Fatalities in  
766 wild goats in Kurdistan associated with Peste des Petits Ruminants virus. *Transbound Emerg Dis.*  
767 2012;59(2):173-6. Epub 2011/11/15. doi: 10.1111/j.1865-1682.2011.01270.x. PubMed PMID: 22074184.
- 768 9. Abubakar M, Rajput ZI, Arshed MJ, Sarwar G, Ali Q. Evidence of peste des petits ruminants  
769 virus (PPRV) infection in Sindh Ibex (*Capra aegagrus blythi*) in Pakistan as confirmed by detection of  
770 antigen and antibody. *Trop Anim Health Prod.* 2011;43(4):745-7. Epub 2011/01/12. doi:  
771 10.1007/s11250-010-9776-y. PubMed PMID: 21221782.
- 772 10. Li J, Li L, Wu X, Liu F, Zou Y, Wang Q, et al. Diagnosis of Peste des Petits Ruminants in Wild  
773 and Domestic Animals in Xinjiang, China, 2013-2016. *Transbound Emerg Dis.* 2017;64(6):e43-e7.  
774 Epub 2017/01/20. doi: 10.1111/tbed.12600. PubMed PMID: 28101989.
- 775 11. Xia J, Zheng XG, Adili GZ, Wei YR, Ma WG, Xue XM, et al. Sequence analysis of peste des  
776 petits ruminants virus from ibexes in Xinjiang, China. *Genet Mol Res.* 2016;15(2). Epub 2016/06/21.  
777 doi: 10.4238/gmr.15027783. PubMed PMID: 27323119.
- 778 12. Zhu Z, Zhang X, Adili G, Huang J, Du X, Zhang X, et al. Genetic Characterization of a Novel  
779 Mutant of Peste Des Petits Ruminants Virus Isolated from *Capra ibex* in China during 2015. *Biomed*  
780 *Res Int.* 2016;2016:7632769. Epub 2016/03/22. doi: 10.1155/2016/7632769. PubMed PMID:  
781 26998489; PubMed Central PMCID: PMC4779526.
- 782 13. Bao J, Wang Q, Parida S, Liu C, Zhang L, Zhao W, et al. Complete genome sequence of a  
783 Peste des petits ruminants virus recovered from wild bharal in Tibet, China. *J Virol.*  
784 2012;86(19):10885-6. Epub 2012/09/12. doi: 10.1128/JVI.01503-12. PubMed PMID: 22966182;  
785 PubMed Central PMCID: PMC3457324.
- 786 14. Bao J, Wang Z, Li L, Wu X, Sang P, Wu G, et al. Detection and genetic characterization of  
787 peste des petits ruminants virus in free-living bharals (*Pseudois nayaur*) in Tibet, China. *Res Vet Sci.*  
788 2011;90(2):238-40. Epub 2010/07/02. doi: 10.1016/j.rvsc.2010.05.031. PubMed PMID: 20591454.

- 789 15. Li L, Cao X, Wu J, Dou Y, Meng X, Liu D, et al. Epidemic and evolutionary characteristics of  
790 peste des petits ruminants virus infecting *Procavia przewalskii* in Western China. *Infect Genet Evol.*  
791 2019;75:104004. Epub 2019/08/16. doi: 10.1016/j.meegid.2019.104004. PubMed PMID: 31415822.
- 792 16. Aguilar XF, Fine AE, Pruvot M, Njeumi F, Walzer C, Kock R, et al. PPR virus threatens wildlife  
793 conservation. *Science.* 2018;362(6411):165-6. Epub 2018/10/13. doi: 10.1126/science.aav4096.  
794 PubMed PMID: 30309937.
- 795 17. Pruvot M, Fine AE, Hollinger C, Strindberg S, Damdinjav B, Buuveibaatar B, et al. Outbreak  
796 of Peste des Petits Ruminants among Critically Endangered Mongolian Saiga and Other Wild  
797 Ungulates, Mongolia, 2016-2017. *Emerg Infect Dis.* 2020;26(1):51-62. Epub 2019/12/20. doi:  
798 10.3201/eid2601.181998. PubMed PMID: 31855146; PubMed Central PMCID: PMC6924898.
- 799 18. Mahapatra M, Sayalel K, Muniraju M, Eblate E, Fyumagwa R, Shilinde L, et al. Spillover of  
800 Peste des Petits Ruminants Virus from Domestic to Wild Ruminants in the Serengeti Ecosystem,  
801 Tanzania. *Emerg Infect Dis.* 2015;21(12):2230-4. Epub 2015/11/20. doi: 10.3201/eid2112.150223.  
802 PubMed PMID: 26583961; PubMed Central PMCID: PMC4672450.
- 803 19. Fernandez Aguilar X, Mahapatra M, Begovoeva M, Kalema-Zikusoka G, Driciru M,  
804 Ayebazibwe C, et al. Peste des Petits Ruminants at the Wildlife-Livestock Interface in the Northern  
805 Albertine Rift and Nile Basin, East Africa. *Viruses.* 2020;12(3). Epub 2020/03/12. doi:  
806 10.3390/v12030293. PubMed PMID: 32156067; PubMed Central PMCID: PMC7150925.
- 807 20. Asil RM, Ludlow M, Ballal A, Alsarraj S, Ali WH, Mohamed BA, et al. First detection and  
808 genetic characterization of peste des petits ruminants virus from dorcas gazelles "*Gazella dorcas*" in  
809 the Sudan, 2016-2017. *Arch Virol.* 2019;164(10):2537-43. Epub 2019/07/17. doi: 10.1007/s00705-019-  
810 04330-w. PubMed PMID: 31309291.
- 811 21. Berkowitz A, Avni-Magen N, Bouznach A, Waner T, Litvak A, Friedgut O, et al. Pathological  
812 and molecular characterisation of peste des petits ruminants in Nubian ibex (*Capra nubiana*) in  
813 Israel. *Arch Virol.* 2019;164(8):1997-2003. Epub 2019/05/16. doi: 10.1007/s00705-019-04269-y.  
814 PubMed PMID: 31089959.

- 815 22. Furley CW, Taylor WP, Obi TU. An outbreak of peste des petits ruminants in a zoological  
816 collection. *Vet Rec.* 1987;121(19):443-7. Epub 1987/11/07. doi: 10.1136/vr.121.19.443. PubMed PMID:  
817 3424615.
- 818 23. Kinne J, Kreutzer R, Kreutzer M, Wernery U, Wohlsein P. Peste des petits ruminants in  
819 Arabian wildlife. *Epidemiol Infect.* 2010;138(8):1211-4. Epub 2010/01/14. doi:  
820 10.1017/S0950268809991592. PubMed PMID: 20067659.
- 821 24. Abdullah N, Kelly JT, Graham SC, Birch J, Goncalves-Carneiro D, Mitchell T, et al. Structure-  
822 Guided Identification of a Nonhuman Morbillivirus with Zoonotic Potential. *J Virol.* 2018;92(23).  
823 Epub 2018/09/21. doi: 10.1128/JVI.01248-18. PubMed PMID: 30232185; PubMed Central PMCID:  
824 PMC6232486.
- 825 25. Nikolin VM, Olarte-Castillo XA, Osterrieder N, Hofer H, Dubovi E, Mazzoni CJ, et al. Canine  
826 distemper virus in the Serengeti ecosystem: molecular adaptation to different carnivore species.  
827 *Mol Ecol.* 2017;26(7):2111-30. Epub 2016/12/09. doi: 10.1111/mec.13902. PubMed PMID: 27928865;  
828 PubMed Central PMCID: PMC67168383.
- 829 26. Ohishi K, Suzuki R, Maeda T, Tsuda M, Abe E, Yoshida T, et al. Recent host range expansion  
830 of canine distemper virus and variation in its receptor, the signaling lymphocyte activation  
831 molecule, in carnivores. *J Wildl Dis.* 2014;50(3):596-606. Epub 2014/05/09. doi: 10.7589/2013-09-  
832 228. PubMed PMID: 24807184.
- 833 27. Bieringer M, Han JW, Kendl S, Khosravi M, Plattet P, Schneider-Schaulies J. Experimental  
834 adaptation of wild-type canine distemper virus (CDV) to the human entry receptor CD150. *PLoS*  
835 *One.* 2013;8(3):e57488. Epub 2013/04/05. doi: 10.1371/journal.pone.0057488. PubMed PMID:  
836 23554862; PubMed Central PMCID: PMC3595274.
- 837 28. Hashiguchi T, Ose T, Kubota M, Maita N, Kamishikiryo J, Maenaka K, et al. Structure of the  
838 measles virus hemagglutinin bound to its cellular receptor SLAM. *Nat Struct Mol Biol.*  
839 2011;18(2):135-41. Epub 2011/01/11. doi: 10.1038/nsmb.1969. PubMed PMID: 21217702.

- 840 29. Meng X, Zhu X, Alfred N, Zhang Z. Identification of amino acid residues involved in the  
841 interaction between peste-des-petits-ruminants virus haemagglutinin protein and cellular  
842 receptors. *J Gen Virol.* 2020;101(3):242-51. Epub 2019/12/21. doi: 10.1099/jgv.0.001368. PubMed  
843 PMID: 31859612; PubMed Central PMCID: PMC7416607.
- 844 30. Gallo G, Conceicao C, Tsirigoti C, Willett B, Graham SC, Bailey D. Application of error-prone  
845 PCR to functionally probe the morbillivirus Haemagglutinin protein. *J Gen Virol.* 2021. Epub  
846 2021/03/20. doi: 10.1099/jgv.0.001580. PubMed PMID: 33739251.
- 847 31. Couacy-Hymann E, Roger F, Hurard C, Guillou JP, Libeau G, Diallo A. Rapid and sensitive  
848 detection of peste des petits ruminants virus by a polymerase chain reaction assay. *J Virol Methods.*  
849 2002;100(1-2):17-25. Epub 2001/12/18. doi: 10.1016/s0166-0934(01)00386-x. PubMed PMID:  
850 11742649.
- 851 32. Kumar KS, Babu A, Sundarapandian G, Roy P, Thangavelu A, Kumar KS, et al. Molecular  
852 characterisation of lineage IV peste des petits ruminants virus using multi gene sequence data. *Vet*  
853 *Microbiol.* 2014;174(1-2):39-49. Epub 2014/09/25. doi: 10.1016/j.vetmic.2014.08.031. PubMed PMID:  
854 25248690.
- 855 33. Dundon WG, Diallo A, Cattoli G. Peste des petits ruminants in Africa: a review of currently  
856 available molecular epidemiological data, 2020. *Arch Virol.* 2020;165(10):2147-63. Epub 2020/07/13.  
857 doi: 10.1007/s00705-020-04732-1. PubMed PMID: 32653984; PubMed Central PMCID:  
858 PMC7497342.
- 859 34. Libeau G, Diallo A, Parida S. Evolutionary genetics underlying the spread of peste des petits  
860 ruminants virus. *Animal Frontiers.* 2014;4(1):14-20. doi: 10.2527/af.2014-0003.
- 861 35. Tounkara K, Bataille A, Adombi CM, Maikano I, Djibo G, Settypalli TBK, et al. First genetic  
862 characterization of Peste des Petits Ruminants from Niger: On the advancing front of the Asian  
863 virus lineage. *Transbound Emerg Dis.* 2018;65(5):1145-51. Epub 2018/07/26. doi: 10.1111/tbed.12901.  
864 PubMed PMID: 30043436.



- 865 36. Tounkara K, Kwiatek O, Sidibe CAK, Sery A, Dakouo M, Salami H, et al. Persistence of the  
866 historical lineage I of West Africa against the ongoing spread of the Asian lineage of peste des petits  
867 ruminants virus. *Transbound Emerg Dis*. 2021. Epub 2021/03/12. doi: 10.1111/tbed.14066. PubMed  
868 PMID: 33704888.
- 869 37. Baron MD, Diop B, Njeumi F, Willett BJ, Bailey D. Future research to underpin successful  
870 peste des petits ruminants virus (PPRV) eradication. *J Gen Virol*. 2017;98(11):2635-44. Epub  
871 2017/10/13. doi: 10.1099/jgv.0.000944. PubMed PMID: 29022862; PubMed Central PMCID:  
872 PMCPMC5845661.
- 873 38. Muniraju M, Munir M, Parthiban AR, Banyard AC, Bao J, Wang Z, et al. Molecular evolution  
874 of peste des petits ruminants virus. *Emerg Infect Dis*. 2014;20(12):2023-33. Epub 2014/11/25. doi:  
875 10.3201/eid2012.140684. PubMed PMID: 25418782; PubMed Central PMCID: PMCPMC4257836.
- 876 39. Shabbir MZ, Rahman AU, Munir M. A comprehensive global perspective on phylogenomics  
877 and evolutionary dynamics of Small ruminant morbillivirus. *Sci Rep*. 2020;10(1):17. Epub  
878 2020/01/09. doi: 10.1038/s41598-019-54714-w. PubMed PMID: 31913305; PubMed Central PMCID:  
879 PMCPMC6949297.
- 880 40. Shatar M, Khanui B, Purevtseren D, Khishgee B, Loitsch A, Unger H, et al. First genetic  
881 characterization of peste des petits ruminants virus from Mongolia. *Arch Virol*. 2017;162(10):3157-  
882 60. Epub 2017/07/02. doi: 10.1007/s00705-017-3456-4. PubMed PMID: 28667443.
- 883 41. Bao J, Wang Q, Li L, Liu C, Zhang Z, Li J, et al. Evolutionary dynamics of recent peste des  
884 petits ruminants virus epidemic in China during 2013-2014. *Virology*. 2017;510:156-64. Epub  
885 2017/07/25. doi: 10.1016/j.virol.2017.07.018. PubMed PMID: 28734191; PubMed Central PMCID:  
886 PMCPMC7111700.
- 887 42. Clarke B, Mahapatra M, Friedgut O, Bumbarov V, Parida S. Persistence of Lineage IV Peste-  
888 des-petits ruminants virus within Israel since 1993: An evolutionary perspective. *PLoS One*.  
889 2017;12(5):e0177028. Epub 2017/05/26. doi: 10.1371/journal.pone.0177028. PubMed PMID:  
890 28545149; PubMed Central PMCID: PMCPMC5436660.

- 891 43. Kock R. Food and Agriculture Organisation of the United Nations, Crisis Management  
892 Centre-Animal Health Mission Report: Investigation of Peste des Petits Ruminants (PPR) among  
893 wild animals and its potential impact on the current PPR situation in livestock. 2017.
- 894 44. Wernike K, Eschbaumer M, Breithaupt A, Maltzan J, Wiesner H, Beer M, et al. Experimental  
895 infection of sheep and goats with a recent isolate of peste des petits ruminants virus from  
896 Kurdistan. *Vet Microbiol.* 2014;172(1-2):140-5. Epub 2014/06/09. doi: 10.1016/j.vetmic.2014.05.010.  
897 PubMed PMID: 24908276.
- 898 45. Schulz C, Fast C, Schlottau K, Hoffmann B, Beer M. Neglected Hosts of Small Ruminant  
899 Morbillivirus. *Emerg Infect Dis.* 2018;24(12):2334-7. Epub 2018/11/21. doi: 10.3201/eid2412.180507.  
900 PubMed PMID: 30457523; PubMed Central PMCID: PMC6256395.
- 901 46. Beaty SM, Lee B. Constraints on the Genetic and Antigenic Variability of Measles Virus.  
902 *Viruses.* 2016;8(4):109. Epub 2016/04/26. doi: 10.3390/v8040109. PubMed PMID: 27110809; PubMed  
903 Central PMCID: PMC4848602.
- 904 47. Han GZ, Worobey M. Homologous recombination in negative sense RNA viruses. *Viruses.*  
905 2011;3(8):1358-73. Epub 2011/10/14. doi: 10.3390/v3081358. PubMed PMID: 21994784; PubMed  
906 Central PMCID: PMC3185808.
- 907 48. Shabbir MZ, Rahman AU, Munir M. Author Correction: A comprehensive global perspective  
908 on phylogenomics and evolutionary dynamics of Small ruminant morbillivirus. *Sci Rep.*  
909 2020;10(1):20997. Epub 2020/11/28. doi: 10.1038/s41598-020-78219-z. PubMed PMID: 33244107;  
910 PubMed Central PMCID: PMC7691326.
- 911 49. Liu F. Letter to the editor concerning "First report of peste des petits ruminants virus  
912 lineage II in *Hydropotes inermis*, China" by Zhou et al. (*Transbound Emerg Dis*; 2017:  
913 <https://doi.org/10.1111/tbed.12683>). *Transbound Emerg Dis.* 2018;65(4):1125. Epub 2018/02/25. doi:  
914 10.1111/tbed.12840. PubMed PMID: 29476605.

- 915 50. Padhi A, Ma L. Genetic and epidemiological insights into the emergence of peste des petits  
916 ruminants virus (PPRV) across Asia and Africa. *Sci Rep.* 2014;4:7040. Epub 2014/11/14. doi:  
917 10.1038/srep07040. PubMed PMID: 25391314; PubMed Central PMCID: PMC4229660.
- 918 51. Banyard AC, Parida S, Batten C, Oura C, Kwiatek O, Libeau G. Global distribution of peste  
919 des petits ruminants virus and prospects for improved diagnosis and control. *J Gen Virol.* 2010;91(Pt  
920 12):2885-97. Epub 2010/09/17. doi: 10.1099/vir.0.025841-0. PubMed PMID: 20844089.
- 921 52. Kwiatek O, Ali YH, Saeed IK, Khalafalla AI, Mohamed OI, Obeida AA, et al. Asian lineage of  
922 peste des petits ruminants virus, Africa. *Emerg Infect Dis.* 2011;17(7):1223-31. Epub 2011/07/19. doi:  
923 10.3201/eid1707.101216. PubMed PMID: 21762576; PubMed Central PMCID: PMC3381390.
- 924 53. Rahman AU, Munir M, Shabbir MZ. A comparative phylogenomic analysis of peste des  
925 petits ruminants virus isolated from wild and unusual hosts. *Mol Biol Rep.* 2019;46(5):5587-93. Epub  
926 2019/07/19. doi: 10.1007/s11033-019-04973-7. PubMed PMID: 31317455.
- 927 54. Wu X, Li L, Li J, Liu C, Wang Q, Bao JY, et al. Peste des Petits Ruminants Viruses Re-  
928 emerging in China, 2013-2014. *Transbound Emerg Dis.* 2016;63(5):e441-6. Epub 2015/01/27. doi:  
929 10.1111/tbed.12308. PubMed PMID: 25620455.
- 930 55. Gao X, Wen-xuan X, Yang W, Blank D, Qiao J, Xu K. Status and distribution of ungulates in  
931 Xinjiang, China. *Journal of Arid Land.* 2011;3:49-60.
- 932 56. Li XP, Zhai SL, He DS, Guo PJ, Lv DH, Wen XH, et al. Genome characterization and  
933 phylogenetic analysis of a lineage IV peste des petits ruminants virus in southern China. *Virus*  
934 *Genes.* 2015;51(3):361-6. Epub 2015/11/18. doi: 10.1007/s11262-015-1249-y. PubMed PMID:  
935 26573282.
- 936 57. Calain P, Roux L. The rule of six, a basic feature for efficient replication of Sendai virus  
937 defective interfering RNA. *J Virol.* 1993;67(8):4822-30. Epub 1993/08/01. doi: 10.1128/JVI.67.8.4822-  
938 4830.1993. PubMed PMID: 8392616; PubMed Central PMCID: PMC37869.
- 939 58. Ivancic-Jelecki J, Slovic A, Santak M, Tesovic G, Forcic D. Common position of indels that  
940 cause deviations from canonical genome organization in different measles virus strains. *Virol J.*

- 941 2016;13:134. Epub 2016/07/31. doi: 10.1186/s12985-016-0587-2. PubMed PMID: 27473517; PubMed  
942 Central PMCID: PMC4966754.
- 943 59. King S, Rajko-Nenow P, Ropiak HM, Ribeca P, Batten C, Baron MD. Full genome sequencing  
944 of archived wild type and vaccine rinderpest virus isolates prior to their destruction. Sci Rep.  
945 2020;10(1):6563. Epub 2020/04/18. doi: 10.1038/s41598-020-63707-z. PubMed PMID: 32300201;  
946 PubMed Central PMCID: PMC7162898.
- 947 60. Bankamp B, Liu C, Rivailler P, Bera J, Shrivastava S, Kirkness EF, et al. Wild-type measles  
948 viruses with non-standard genome lengths. PLoS One. 2014;9(4):e95470. Epub 2014/04/22. doi:  
949 10.1371/journal.pone.0095470. PubMed PMID: 24748123; PubMed Central PMCID:  
950 PMC3991672.
- 951 61. Gil H, Fernandez-Garcia A, Mosquera MM, Hubschen JM, Castellanos AM, de Ory F, et al.  
952 Measles virus genotype D4 strains with non-standard length M-F non-coding region circulated  
953 during the major outbreaks of 2011-2012 in Spain. PLoS One. 2018;13(7):e0199975. Epub  
954 2018/07/17. doi: 10.1371/journal.pone.0199975. PubMed PMID: 30011283; PubMed Central PMCID:  
955 PMC6047782.
- 956 62. Chulakasian S, Chang TJ, Tsai CH, Wong ML, Hsu WL. Translational enhancing activity in 5'  
957 UTR of peste des petits ruminants virus fusion gene. FEBS J. 2013;280(5):1237-48. Epub 2013/01/08.  
958 doi: 10.1111/febs.12115. PubMed PMID: 23289829.
- 959 63. Frost SDW, Magalis BR, Kosakovsky Pond SL. Neutral Theory and Rapidly Evolving Viral  
960 Pathogens. Mol Biol Evol. 2018;35(6):1348-54. Epub 2018/04/25. doi: 10.1093/molbev/msy088.  
961 PubMed PMID: 29688481; PubMed Central PMCID: PMC6279309.
- 962 64. Spielman SJ, Weaver S, Shank SD, Magalis BR, Li M, Kosakovsky Pond SL. Evolution of Viral  
963 Genomes: Interplay Between Selection, Recombination, and Other Forces. Methods Mol Biol.  
964 2019;1910:427-68. Epub 2019/07/07. doi: 10.1007/978-1-4939-9074-0\_14. PubMed PMID: 31278673.
- 965 65. Agrawal A, Gupta R, Gattani A, Kumar Patel S, Hira Khan M, Singh P. Novel T Cell Epitope  
966 Designing from PPRV HN Protein for Peptide based Subunit Vaccine: An Immune Informatics

- 967 Approach. *IntJCurrMicrobiolAppSci*. 2020;9(3):2432-9. doi:  
968 <https://doi.org/10.20546/ijcmas.2020.903.278>.
- 969 66. Liang Z, Yuan R, Chen L, Zhu X, Dou Y. Molecular Evolution and Characterization of  
970 Hemagglutinin (H) in Peste des Petits Ruminants Virus. *PLoS One*. 2016;11(4):e0152587. Epub  
971 2016/04/02. doi: 10.1371/journal.pone.0152587. PubMed PMID: 27035347; PubMed Central PMCID:  
972 PMC4818033.
- 973 67. Chinnakannan SK, Nanda SK, Baron MD. Morbillivirus v proteins exhibit multiple  
974 mechanisms to block type 1 and type 2 interferon signalling pathways. *PLoS One*. 2013;8(2):e57063.  
975 Epub 2013/02/23. doi: 10.1371/journal.pone.0057063. PubMed PMID: 23431397; PubMed Central  
976 PMCID: PMC3576338.
- 977 68. Li L, Shi X, Zhang D, Cao X, Ali A, Bai J. Peste des petits ruminants virus V protein inhibits  
978 cellular antiviral response by blocking the secretion of endogenous and exogenous interferons. *J  
979 Vet Med Sci*. 2020. Epub 2020/11/17. doi: 10.1292/jvms.20-0487. PubMed PMID: 33191335.
- 980 69. Li P, Zhu Z, Zhang X, Dang W, Li L, Du X, et al. The Nucleoprotein and Phosphoprotein of  
981 Peste des Petits Ruminants Virus Inhibit Interferons Signaling by Blocking the JAK-STAT Pathway.  
982 *Viruses*. 2019;11(7). Epub 2019/07/11. doi: 10.3390/v11070629. PubMed PMID: 31288481; PubMed  
983 Central PMCID: PMC6669484.
- 984 70. Zhu Z, Li P, Yang F, Cao W, Zhang X, Dang W, et al. Peste des Petits Ruminants Virus  
985 Nucleocapsid Protein Inhibits Beta Interferon Production by Interacting with IRF3 To Block Its  
986 Activation. *J Virol*. 2019;93(16). Epub 2019/06/07. doi: 10.1128/JVI.00362-19. PubMed PMID:  
987 31167907; PubMed Central PMCID: PMC6675899.
- 988 71. Crispell J, Benton CH, Balaz D, De Maio N, Ahkmetova A, Allen A, et al. Combining  
989 genomics and epidemiology to analyse bi-directional transmission of *Mycobacterium bovis* in a  
990 multi-host system. *Elife*. 2019;8. Epub 2019/12/18. doi: 10.7554/eLife.45833. PubMed PMID:  
991 31843054; PubMed Central PMCID: PMC6917503.

- 992 72. Viana M, Shirima GM, John KS, Fitzpatrick J, Kazwala RR, Buza JJ, et al. Integrating  
993 serological and genetic data to quantify cross-species transmission: brucellosis as a case study.  
994 *Parasitology*. 2016;143(7):821-34. Epub 2016/03/05. doi: 10.1017/S0031182016000044. PubMed  
995 PMID: 26935267; PubMed Central PMCID: PMC4873909.
- 996 73. Bataille A, Salami H, Seck I, Lo MM, Ba A, Diop M, et al. Combining viral genetic and animal  
997 mobility network data to unravel peste des petits ruminants transmission dynamics in West Africa.  
998 *PLoS Pathog*. 2021;17(3):e1009397. Epub 2021/03/19. doi: 10.1371/journal.ppat.1009397. PubMed  
999 PMID: 33735294; PubMed Central PMCID: PMC8009415 Mohamed Keyra, Abdellahi Salem  
1000 Lella were unable to confirm their authorship contributions. On their behalf, the corresponding  
1001 author has reported their contributions to the best of their knowledge.
- 1002 74. Li H, Durbin R. Fast and accurate long-read alignment with Burrows-Wheeler transform.  
1003 *Bioinformatics*. 2010;26(5):589-95. Epub 2010/01/19. doi: 10.1093/bioinformatics/btp698. PubMed  
1004 PMID: 20080505; PubMed Central PMCID: PMC2828108.
- 1005 75. Li H, Handsaker B, Wysoker A, Fennell T, Ruan J, Homer N, et al. The Sequence  
1006 Alignment/Map format and SAMtools. *Bioinformatics*. 2009;25(16):2078-9. Epub 2009/06/10. doi:  
1007 10.1093/bioinformatics/btp352. PubMed PMID: 19505943; PubMed Central PMCID:  
1008 PMC2723002.
- 1009 76. Bankevich A, Nurk S, Antipov D, Gurevich AA, Dvorkin M, Kulikov AS, et al. SPAdes: a new  
1010 genome assembly algorithm and its applications to single-cell sequencing. *J Comput Biol*.  
1011 2012;19(5):455-77. Epub 2012/04/18. doi: 10.1089/cmb.2012.0021. PubMed PMID: 22506599;  
1012 PubMed Central PMCID: PMC3342519.
- 1013 77. Katoh K, Misawa K, Kuma K, Miyata T. MAFFT: a novel method for rapid multiple sequence  
1014 alignment based on fast Fourier transform. *Nucleic Acids Res*. 2002;30(14):3059-66. Epub  
1015 2002/07/24. doi: 10.1093/nar/gkf436. PubMed PMID: 12136088; PubMed Central PMCID:  
1016 PMC135756.

- 1017 78. Rambaut A, Lam TT, Max Carvalho L, Pybus OG. Exploring the temporal structure of  
1018 heterochronous sequences using TempEst (formerly Path-O-Gen). *Virus Evol.* 2016;2(1):vewoo7.  
1019 Epub 2016/10/25. doi: 10.1093/ve/vewoo7. PubMed PMID: 27774300; PubMed Central PMCID:  
1020 PMCPMC4989882.
- 1021 79. Martin DP, Murrell B, Golden M, Khoosal A, Muhire B. RDP4: Detection and analysis of  
1022 recombination patterns in virus genomes. *Virus Evol.* 2015;1(1):vevoo3. Epub 2015/05/26. doi:  
1023 10.1093/ve/vevoo3. PubMed PMID: 27774277; PubMed Central PMCID: PMCPMC5014473.
- 1024 80. Kumar S, Stecher G, Tamura K. MEGA7: Molecular Evolutionary Genetics Analysis Version  
1025 7.0 for Bigger Datasets. *Mol Biol Evol.* 2016;33(7):1870-4. Epub 2016/03/24. doi:  
1026 10.1093/molbev/msw054. PubMed PMID: 27004904.
- 1027 81. Suchard MA, Lemey P, Baele G, Ayres DL, Drummond AJ, Rambaut A. Bayesian  
1028 phylogenetic and phylodynamic data integration using BEAST 1.10. *Virus Evol.* 2018;4(1):veyo16.  
1029 Epub 2018/06/27. doi: 10.1093/ve/veyo16. PubMed PMID: 29942656; PubMed Central PMCID:  
1030 PMCPMC6007674.
- 1031 82. Rambaut A, Drummond AJ, Xie D, Baele G, Suchard MA. Posterior Summarization in  
1032 Bayesian Phylogenetics Using Tracer 1.7. *Syst Biol.* 2018;67(5):901-4. Epub 2018/05/03. doi:  
1033 10.1093/sysbio/syy032. PubMed PMID: 29718447; PubMed Central PMCID: PMCPMC6101584.
- 1034 83. Drummond AJ, Ho SY, Phillips MJ, Rambaut A. Relaxed phylogenetics and dating with  
1035 confidence. *PLoS Biol.* 2006;4(5):e88. Epub 2006/05/11. doi: 10.1371/journal.pbio.0040088. PubMed  
1036 PMID: 16683862; PubMed Central PMCID: PMCPMC1395354.
- 1037 84. Argimon S, Abudahab K, Goater RJE, Fedosejev A, Bhai J, Glasner C, et al. Microreact:  
1038 visualizing and sharing data for genomic epidemiology and phylogeography. *Microb Genom.*  
1039 2016;2(11):e000093. Epub 2017/03/30. doi: 10.1099/mgen.0.000093. PubMed PMID: 28348833;  
1040 PubMed Central PMCID: PMCPMC5320705.
- 1041 85. Bielejec F, Baele G, Vrancken B, Suchard MA, Rambaut A, Lemey P. SpreaD3: Interactive  
1042 Visualization of Spatiotemporal History and Trait Evolutionary Processes. *Mol Biol Evol.*

- 1043 2016;33(8):2167-9. Epub 2016/05/18. doi: 10.1093/molbev/mswo82. PubMed PMID: 27189542;
- 1044 PubMed Central PMCID: PMC6398721.
- 1045 86. Murrell B, Moola S, Mabona A, Weighill T, Sheward D, Kosakovsky Pond SL, et al. FUBAR: a  
1046 fast, unconstrained bayesian approximation for inferring selection. *Mol Biol Evol.* 2013;30(5):1196-  
1047 205. Epub 2013/02/20. doi: 10.1093/molbev/msto30. PubMed PMID: 23420840; PubMed Central  
1048 PMCID: PMC3670733.
- 1049 87. Kosakovsky Pond SL, Frost SD. Not so different after all: a comparison of methods for  
1050 detecting amino acid sites under selection. *Mol Biol Evol.* 2005;22(5):1208-22. Epub 2005/02/11. doi:  
1051 10.1093/molbev/msi105. PubMed PMID: 15703242.
- 1052 88. Weaver S, Shank SD, Spielman SJ, Li M, Muse SV, Kosakovsky Pond SL. Datamonkey 2.0: A  
1053 Modern Web Application for Characterizing Selective and Other Evolutionary Processes. *Mol Biol*  
1054 *Evol.* 2018;35(3):773-7. Epub 2018/01/05. doi: 10.1093/molbev/msx335. PubMed PMID: 29301006;  
1055 PubMed Central PMCID: PMC5850112.
- 1056 89. Murrell B, Wertheim JO, Moola S, Weighill T, Scheffler K, Kosakovsky Pond SL. Detecting  
1057 individual sites subject to episodic diversifying selection. *PLoS Genet.* 2012;8(7):e1002764. Epub  
1058 2012/07/19. doi: 10.1371/journal.pgen.1002764. PubMed PMID: 22807683; PubMed Central PMCID:  
1059 PMC3395634.
- 1060 90. Gao F, Chen C, Arab DA, Du Z, He Y, Ho SYW. EasyCodeML: A visual tool for analysis of  
1061 selection using CodeML. *Ecol Evol.* 2019;9(7):3891-8. Epub 2019/04/25. doi: 10.1002/ece3.5015.  
1062 PubMed PMID: 31015974; PubMed Central PMCID: PMC6467853.
- 1063 91. Nielsen R, Yang Z. Likelihood models for detecting positively selected amino acid sites and  
1064 applications to the HIV-1 envelope gene. *Genetics.* 1998;148(3):929-36. Epub 1998/04/16. PubMed  
1065 PMID: 9539414; PubMed Central PMCID: PMC1460041.
- 1066 92. Yang Z, Nielsen R, Goldman N, Pedersen AM. Codon-substitution models for  
1067 heterogeneous selection pressure at amino acid sites. *Genetics.* 2000;155(1):431-49. Epub  
1068 2000/05/03. PubMed PMID: 10790415; PubMed Central PMCID: PMC1461088.



1069 93. Yang Z, Wong WS, Nielsen R. Bayes empirical bayes inference of amino acid sites under  
1070 positive selection. *Mol Biol Evol.* 2005;22(4):1107-18. Epub 2005/02/04. doi: 10.1093/molbev/msi097.  
1071 PubMed PMID: 15689528.

1072 94. Smith MD, Wertheim JO, Weaver S, Murrell B, Scheffler K, Kosakovsky Pond SL. Less is  
1073 more: an adaptive branch-site random effects model for efficient detection of episodic diversifying  
1074 selection. *Mol Biol Evol.* 2015;32(5):1342-53. Epub 2015/02/24. doi: 10.1093/molbev/msv022.  
1075 PubMed PMID: 25697341; PubMed Central PMCID: PMC4408413.

1076 95. Murrell B, Weaver S, Smith MD, Wertheim JO, Murrell S, Aylward A, et al. Gene-wide  
1077 identification of episodic selection. *Mol Biol Evol.* 2015;32(5):1365-71. Epub 2015/02/24. doi:  
1078 10.1093/molbev/msv035. PubMed PMID: 25701167; PubMed Central PMCID: PMC4408417.

1079 96. Schwede T, Kopp J, Guex N, Peitsch MC. SWISS-MODEL: An automated protein homology-  
1080 modeling server. *Nucleic Acids Res.* 2003;31(13):3381-5. Epub 2003/06/26. doi: 10.1093/nar/gkg520.  
1081 PubMed PMID: 12824332; PubMed Central PMCID: PMC4408417.

1082

## 1083 **Supporting information**

### 1084 **S1 Fig. Molecular detection of PPRV N gene in different tissues from wild Mongolian ungulates.**

1085 RT-PCR for PPRV N gene was performed on 2ul RNA extracted from different tissue samples from  
1086 the indicated host (RNA concentration ranged from 26-1125 ng/ul) prior to gel electrophoresis and  
1087 UV transillumination. Lane numbers refer to sample IDs for different tissues given in Table 1. DNA  
1088 ladder markers of different base pair (bp) lengths are shown. 'x' denotes an empty lane; '-' denotes a  
1089 no template control and '+' denotes a positive control RNA template. Samples used subsequently  
1090 for whole genome NGS are marked with \*.

1091

### 1092 **S2 Fig. Untraited Bayesian time-scaled Maximum Clade Credibility Tree.** MCC tree from the

1093 combined output of three MCMC chains run in BEAST v1.10.4, inferred without partitioning the  
1094 data by traits, and visualized in FigTree. The novel genomes from this study are shown in blue. x-

1095 axis shows date. Lineages, referred to as LI, LII, LIII or LIV, are marked. \* indicates posterior  
1096 probability > 0.9 at the node opposite.

1097

1098 **S3 Fig. TempEst analysis of temporal signal in the PPRV genome dataset.** Plots from TempEst  
1099 showing root-to-tip genetic distance against sampling date (A) and residuals (B) for a ML phylogeny  
1100 of 85 PPRV genomes, using the best-fitting root. The correlation coefficient for the regression was  
1101 0.9362 and  $R^2$  was 0.8764. An outlier sequence, shown in blue, was removed from the alignment  
1102 before phylogenetic analysis.

1103

1104 **S1 Table. Illumina NGS read summary for wildlife samples.** Total read number, PPRV-specific  
1105 read number and % total reads which were PPRV are shown for the five novel PPRV genomes from  
1106 wildlife hosts. Average genome coverage was calculated as (read count \* read length) / total  
1107 genome size.

1108

1109 **S2 Table. Recombination analysis using RPD4.** The PPRV genome alignment (n=84) was analysed  
1110 using Recombination Detection Program v4.101 (RPD4) using default settings. Genomes  
1111 unambiguously identified as recombinant sequences are shown, for which at least 5 of 7 of the  
1112 detection methods found significant evidence of recombination. Recombinant: genome sequence  
1113 identified as potential recombinant; Lin-r: PPRV genetic lineage of Recombinant; Minor parental  
1114 sequence: genome sequence identified as most likely minor parent of the recombinant, i.e. most  
1115 closely related to the genome portion inserted; \* indicates that other potential minor parents were  
1116 also identified by RPD4 for that recombination event; Lin-mp: PPRV genetic lineage of minor  
1117 parent; Begin: average genome position (in alignment) of the beginning breakpoint point of  
1118 recombination; End: average genome position (in alignment) of the end breakpoint point of  
1119 recombination; NS: not significant. The p-values for analysis with each of the 7 different

1120 recombination detection algorithms are shown, after Bonferroni correction for multiple  
1121 comparisons.

1122

1123 **S3 Table. Bayes factors for spread of PPRV between countries.** Using SpreaD3, Bayes Factors  
1124 (BFs) were calculated using the log file from the BEAST BSSVS analysis and a discrete set of  
1125 longitude and latitude coordinates for each country, coupled to a geoJSON formatted world map.  
1126 The output gave BFs for all possible transitions between locations. The table shows the transitions  
1127 with posterior probabilities  $>0.7$ . The transition from China to Mongolia, which had the highest BF  
1128 of any transition, is highlighted in grey.

1129

1130 **S4 Table. Values of Log-likelihood (lnL) for PPRV genes using different selection models in the**  
1131 **CodeML analysis, and LRT comparing the two models.** Two different site selection models (in  
1132 which the  $\omega$  ratio varies among codons) were implemented in CodeML: M7 (beta; no positive  
1133 selection) and M8 (beta& $\omega$ ; positive selection). For each gene, Log-likelihood (lnL) values are  
1134 shown and the likelihood ratio test (LRT) to show the significance of model comparison. Bayes  
1135 empirical Bayes (BEB) were used to calculate the posterior probabilities for site classes and identify  
1136 sites under positive selection.

1137

1138 **S5 Table: Evidence from aBSREL for episodic diversifying selection acting on the PPRV L gene.**  
1139 The PPRV L gene was analysed using aBSREL with the China/Mongolia clade selected the set of  
1140 foreground branches on which to test for episodic diversifying selection. Significance was assessed  
1141 using the likelihood ratio test statistic for selection (LRT) at a threshold of  $p \leq 0.05$ , after correcting  
1142 for multiple testing. The two branches shown were identified as under positive selection, while all  
1143 other branches were best described by a single  $\omega$  rate category ( $\omega_1$ ). The  $\omega$  distribution shows  
1144 inferred estimates for  $\omega_1$  and  $\omega_2$  and proportion of sites in each category.

1145

1146 **S1 File: Alignment of PPRV genomes (n=81)**

1147

A

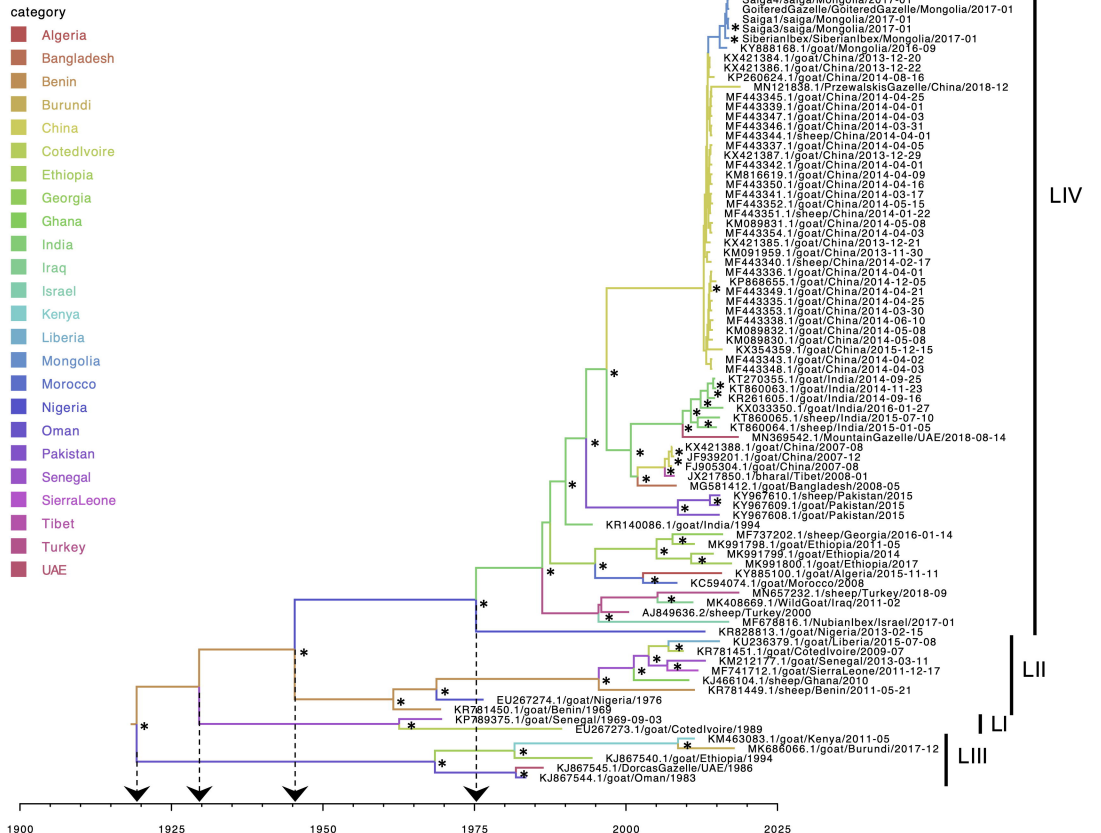

**B**

category

■ livestock

■ wildlife

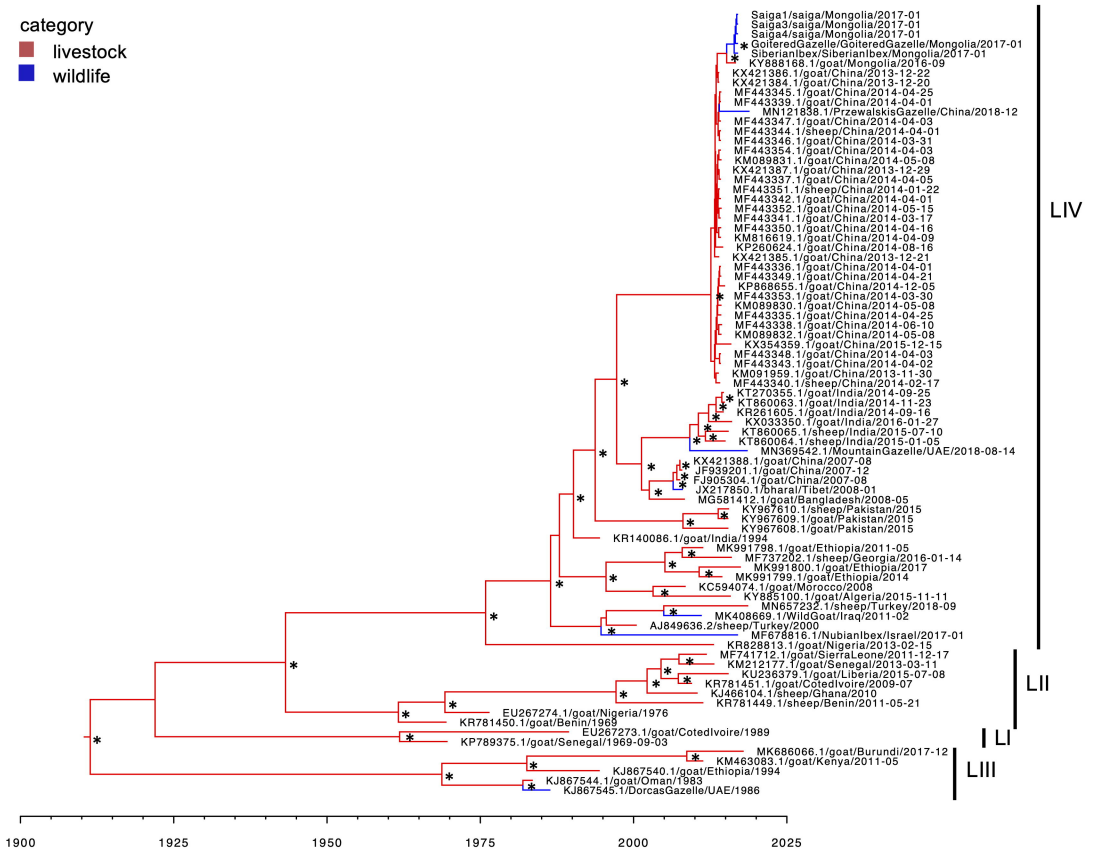

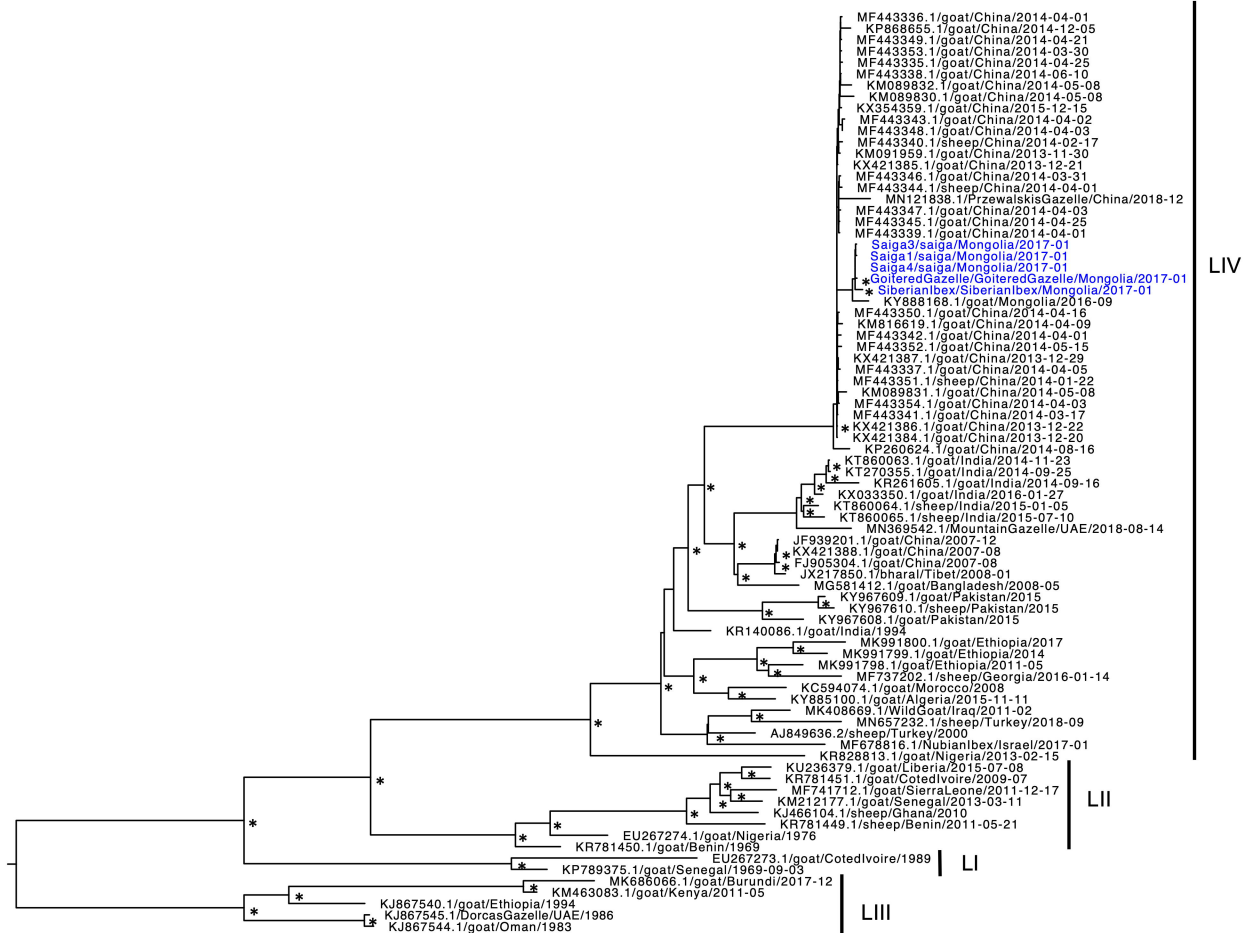

LIV

LII

LIII

0.02

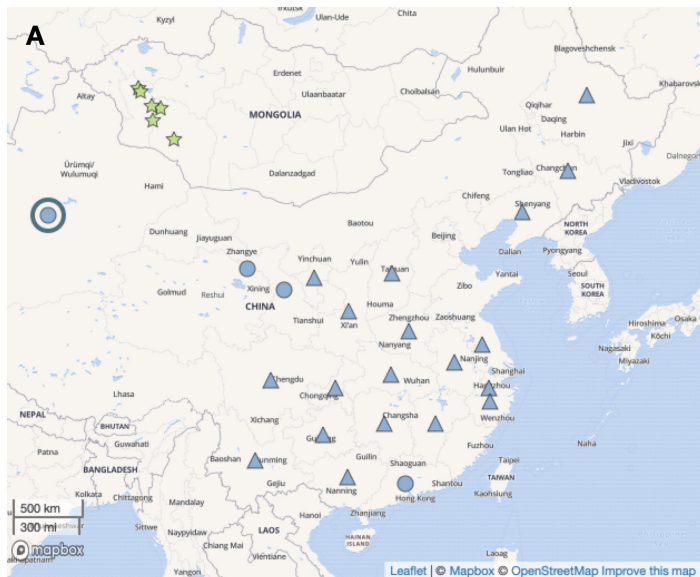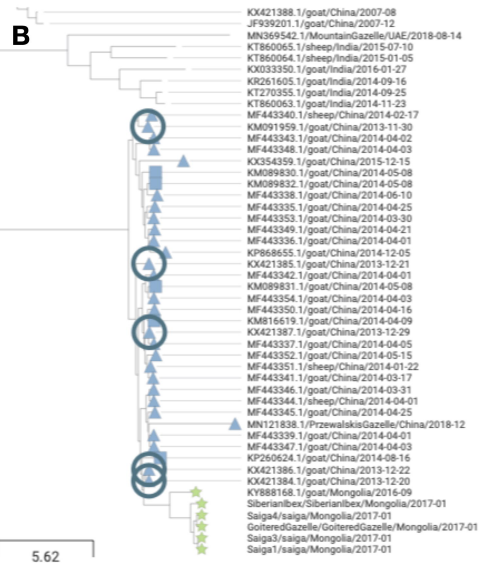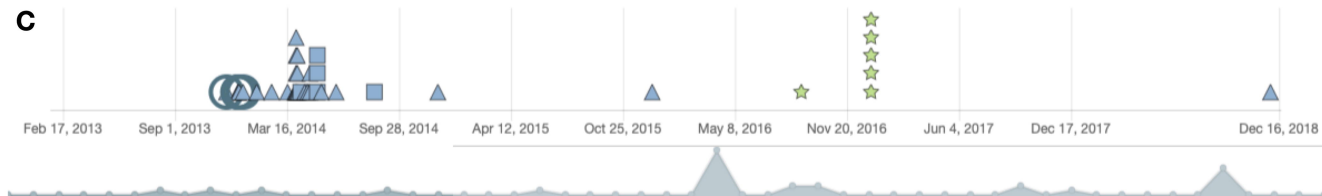



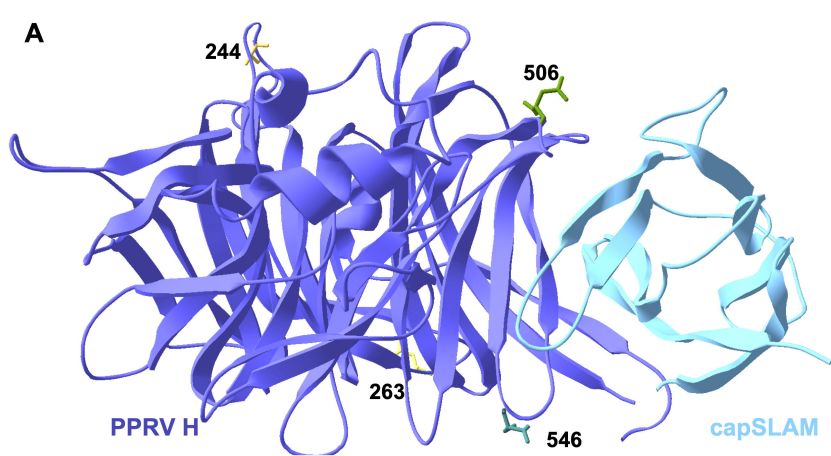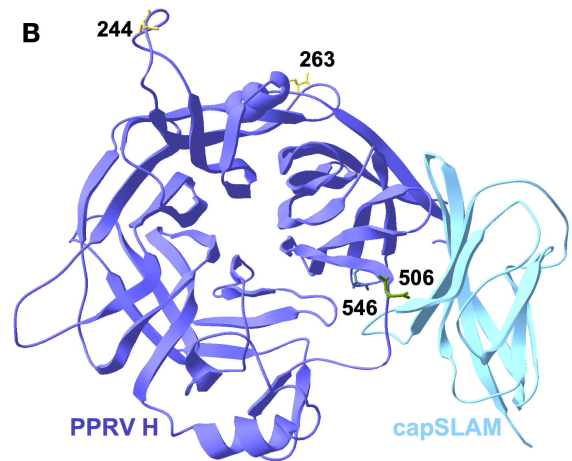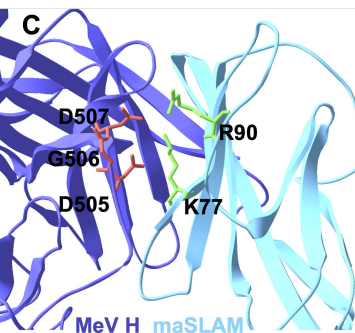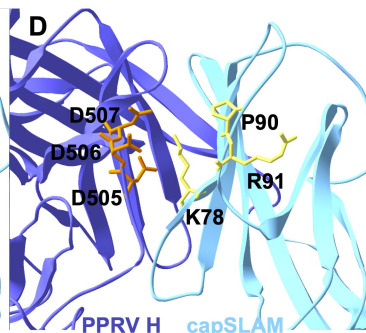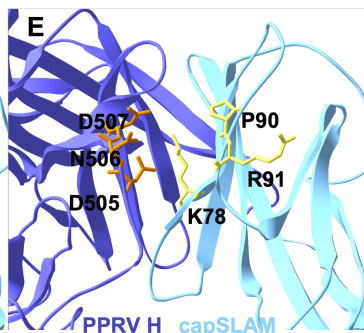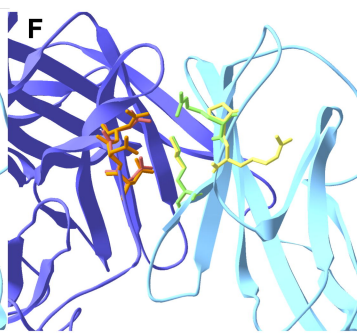

Source: http://biorxiv.org/content/10.1101/2021.05.08.443216v1.full.pdf
