# Supplementary material for: Molecular epidemiology of peste des petits ruminants virus emergence in critically endangered Mongolian saiga antelope and other wild ungulates
Source: bioRxiv or medRxiv preprint supplement (doi:10.1101/2021.05.08.443216), 2021-05-08
Supplement: Supplementary file [file media-4.pdf]

| <b>Sample</b>    | <b>Total reads</b> | <b>PPRV-specific reads</b> | <b>% PPRV</b> | <b>PPRV genome coverage</b> |
|------------------|--------------------|----------------------------|---------------|-----------------------------|
| Saiga_1          | 34,322,736         | 1008                       | <0.003        | x 9.5                       |
| Saiga_3          | 20,500,220         | 318,857                    | 1.56          | x 2998                      |
| Saiga_4          | 33,389,334         | 122,645                    | 0.37          | x 1153                      |
| Goitered gazelle | 36,678,534         | 124,090                    | 0.34          | x 1167                      |
| Siberian ibex    | 39,462,531         | 2,908                      | 0.01          | x 27                        |
