# Supplementary material for: Molecular epidemiology of peste des petits ruminants virus emergence in critically endangered Mongolian saiga antelope and other wild ungulates
Source: bioRxiv or medRxiv preprint supplement (doi:10.1101/2021.05.08.443216), 2021-05-08
Supplement: Supplementary file [file media-5.pdf]

| Recombinant Sequence               | Minor Parental Sequence            | Lin-r | Lin-mp | Breakpoint Positions In Alignment |      | Detection Methods |          |          |          |           |          |          |
|------------------------------------|------------------------------------|-------|--------|-----------------------------------|------|-------------------|----------|----------|----------|-----------|----------|----------|
|                                    |                                    |       |        | Begin                             | End  | RDP               | GENECONV | Bootscan | Maxchi   | Chimaera  | SiSscan  | 3Seq     |
| KR828814.1/goat/Nigeria/2012-05-09 | KR828813.1/goat/Nigeria/2013-02-15 | II    | IV     | 3096                              | 4001 | 1.38E-55          | 7.05E-55 | 1.12E-55 | 7.39E-14 | 4.71E-14  | 2.98E-15 | 1.37E-11 |
| KR828814.1/goat/Nigeria/2012-05-09 | KR828813.1/goat/Nigeria/2013-02-15 | II    | IV     | 6388                              | 6848 | 4.74E-29          | 1.31E-24 | 4.81E-19 | 5.41E-08 | 2.50E-07  | 1.22E-06 | 1.37E-11 |
| KR828814.1/goat/Nigeria/2012-05-09 | KJ867541.1/goat/Ethiopia/2010      | II    | IV     | 550                               | 1073 | 9.97E-13          | NS       | 3.57E-15 | 3.57E-05 | 0.033456  | NS       | 8.63E-07 |
|                                    |                                    |       |        |                                   |      |                   |          |          |          |           |          |          |
| KJ867541.1/goat/Ethiopia/2010      | KC594074.1/goat/Morocco/2008       | IV    | IV     | 4138                              | 5544 | 8.72E-41          | 1.47E-37 | 3.72E-39 | 1.09E-16 | 3.78E-16  | 7.72E-21 | 0.004423 |
|                                    |                                    |       |        |                                   |      |                   |          |          |          |           |          |          |
| KT633939.1/ibex/China/2015-01-20   | KR781450.1/goat/Benin/1969         | IV    | II     | 9084                              | 9556 | 3.20E-40          | 1.03E-32 | 1.56E-38 | 9.99E-10 | 5.40E-09  | 2.71E-09 | 1.03E-11 |
| KT633939.1/ibex/China/2015-01-20   | KR781450.1/goat/Benin/1969         | IV    | II     | 6623                              | 6922 | 1.14E-21          | 5.33E-19 | 1.17E-20 | 0.00012  | 0.0009816 | 4.54E-05 | 2.16E-10 |
