# Supplementary material for: Molecular epidemiology of peste des petits ruminants virus emergence in critically endangered Mongolian saiga antelope and other wild ungulates
Source: bioRxiv or medRxiv preprint supplement (doi:10.1101/2021.05.08.443216), 2021-05-08
Supplement: Supplementary file [file media-6.pdf]

| <b>From</b> | <b>To</b> | <b>Bayes Factor</b> | <b>Posterior Probability</b> |
|-------------|-----------|---------------------|------------------------------|
| China       | Mongolia  | 494                 | 0.96                         |
| Ethiopia    | Georgia   | 103                 | 0.82                         |
| Kenya       | Burundi   | 65                  | 0.75                         |
| Turkey      | Iraq      | 64                  | 0.74                         |
| China       | Tibet     | 56                  | 0.72                         |
| India       | UAE       | 51                  | 0.70                         |
