# Supplementary material for: Molecular epidemiology of peste des petits ruminants virus emergence in critically endangered Mongolian saiga antelope and other wild ungulates
Source: bioRxiv or medRxiv preprint supplement (doi:10.1101/2021.05.08.443216), 2021-05-08
Supplement: Supplementary file [file media-7.pdf]

| <b>Protein</b> | <b>LnL M7</b> | <b>LnL M8</b> | <b>LRT</b> |
|----------------|---------------|---------------|------------|
| <b>N</b>       | -6569.74      | -6554.43      | <0.0001    |
| <b>P</b>       | -6830.54      | -6823.22      | <0.001     |
| <b>C</b>       | -2877.59      | -2875.13      | 0.09       |
| <b>V</b>       | -4191.50      | -4179.66      | <0.0001    |
| <b>M</b>       | -4106.74      | -4106.74      | 1.00       |
| <b>F</b>       | -5750.98      | -5749.07      | 0.15       |
| <b>H</b>       | -8619.88      | -8613.37      | 0.002      |
| <b>L</b>       | -25535.46     | -25513.47     | <0.0001    |
