# Supplementary material for: Molecular epidemiology of peste des petits ruminants virus emergence in critically endangered Mongolian saiga antelope and other wild ungulates
Source: bioRxiv or medRxiv preprint supplement (doi:10.1101/2021.05.08.443216), 2021-05-08
Supplement: Supplementary file [file media-8.pdf]

| <b>Branch name</b>               | <b>LRT</b> | <b>Test p value<br/>(corrected for<br/>multiple testing)</b> | <b><math>\omega</math> distribution</b>                |
|----------------------------------|------------|--------------------------------------------------------------|--------------------------------------------------------|
| KP260624_1_GOAT_CHINA_2014_08_16 | 35.5617    | $2.91 \times 10^{-7}$                                        | $\omega_1 = 0.327$ (100%)<br>$\omega_2 = 4150$ (0.20%) |
| KY888168_1_GOAT_MONGOLIA_2016_09 | 12.3338    | 0.0330                                                       | $\omega_1 = 0.824$ (100%)<br>$\omega_2 = 1970$ (0.21%) |
